# Supplementary material
Source: publisher figshare collection journal article supplement (https://gsajournals.figshare.com/ndownloader/files/22809656)
Supplement: Supplementary file 1 [file 22809656]

## Sheet: ddCT_new_biomarkers
sample	trial	treat	salinity	temp	oxygen	status	ACOT9	anillin	ARHGAP11A	AURKB	calphotin	CDKN1B	CIT	claspin	ECE.2	ERCC6L	FAM214A	GPX3	H2AFV	kif15	KIF2C	kif4	lmnb1	MFHAS1	ncapd3	NCAPG2	ndc80	PAM	PCNA	rab9	RAMP1	RRM1	RRM2	SOX.5	Tonsl
J1001	2_two	SW14N	3_SW	2_14	1_norm	dead	1.23372	0.771466	-0.263468	0.323911	0.148438	0.821298	0.540054	0.978404	0.941708	0.955012	2.75298	2.75859	1.23051	0.072764	-0.202353	0.188035	0.568613	1.42788	1.0166	0.0355173	0.430674	1.08671	0.468938	0.00507908	-0.583351	0.747781	-0.919738	1.45371	1.78885
J1006	2_two	FW10H	1_FW	1_10	2_hypox	moribund	0.582583	0.15881	-0.987206	-0.74126	0.501788	1.38605	-0.0929503	-0.178836	0.609576	-0.987056	2.57109	2.47321	0.886943	-0.651513	1.85771	-0.726695	-0.0200048	1.5683	0.638243	-0.945933	-0.104241	0.732302	-1.16573	-1.03353	0.276055	0.154931	-1.35849	0.608208	0.969512
J1011	2_two	FW10N	1_FW	1_10	1_norm	live	0.5976	-0.220897	-0.0214806	0.790705	0.730514	-1.1934	0.312003	1.21506	0.618886	0.786376	-0.552625	0.0994784	-1.94619	0.920074	0.544551	0.703396	-0.0944658	0.0794633	0.576821	-0.0518699	0.701753	0.402141	0.903083	1.60075	-0.0380622	0.162037	0.248041	-0.777316	1.00133
J1012	2_two	FW10N	1_FW	1_10	1_norm	live	-1.58115	-1.39565	-1.44081	-2.83941	-2.10567	-1.72332	-1.3747	-0.556676	-2.90095	-1.93055	-1.26128	-2.19149	-1.91838	-1.72431	-2.41908	-1.04712	-0.714876	-1.05638	-0.973412	-2.09203	-0.430507	-1.64205	-1.94804	-1.5681	-1.21923	-1.96569	-1.91505	-1.70175	-1.89609
J1023	2_two	FW10N	1_FW	1_10	1_norm	live	-0.126544	-0.144835	-0.838571	-0.531247	0.120522	-1.16017	-0.517462	0.085051	0.458657	-0.647178	-0.778486	-0.71152	-2.32749	-0.27207	-0.0699368	-0.566833	-0.902756	-0.109612	-0.455019	-0.201451	-0.34786	-0.0515963	-0.206584	0.527218	-0.647821	-0.600842	-0.52601	-0.950438	-0.07887
J1024	2_two	FW10N	1_FW	1_10	1_norm	live	-1.3849	-2.57727	-2.34823	-4.10415	-1.98041	-2.5061	-3.41016	-2.60186	-2.24479	-3.31825	-1.64376	-2.12767	-2.31075	-2.24499	-3.12104	-3.38926	-1.67409	-2.32149	-2.99759	-2.68173	-2.03175	-2.86092	-3.1835	-1.92964	-0.951569	-2.53429	-2.95768	-1.40995	-3.30457
J1035	2_two	FW10H	1_FW	1_10	2_hypox	live	-0.549328	0.0870242	-1.0137	-0.22618	-0.0146995	-1.26429	-0.984582	-0.156399	0.321337	-0.557909	-1.11772	-0.750016	-2.63638	-0.153512	-0.353819	-0.694445	-1.19992	0.0379354	-0.739894	-0.975732	-0.940971	-0.46397	-0.52375	0.325149	-0.808698	-0.793628	-0.811811	-1.45725	0.080345
J1036	2_two	FW10H	1_FW	1_10	2_hypox	live	-1.45779	-2.60356	-1.42534	-3.07226	-2.06792	-1.52776	-1.99094	-1.20533	-1.92172	-2.45963	-1.39887	-1.03066	-1.9467	-1.16285	-2.26401	-1.66835	-0.899722	-1.42539	-1.8222	-1.6586	-0.165	-2.11562	-2.79052	-1.51796	-0.769331	-2.03121	-2.02096	-1.1027	-2.42742
J1045	2_two	FW10H	1_FW	1_10	2_hypox	live	-0.267232	0.0714889	-0.643055	0.0527476	0.408712	-0.9999	-0.339198	-0.0472156	0.604952	-0.345985	-0.427027	-0.336018	-2.02571	-0.0473255	0.122432	-0.389785	-0.604643	0.465354	-0.415004	-0.542182	-0.350535	-0.182019	-0.0951093	0.312812	-0.894975	-0.480139	-0.353107	-0.896474	0.3886
J1046	2_two	FW10H	1_FW	1_10	2_hypox	live	-0.982928	-0.895802	-1.20715	-2.6326	-1.00614	-1.27278	-1.41292	-1.30343	-2.21098	-1.69155	-1.23638	-1.6295	-1.63412	-1.41266	-1.87528	-1.69034	-0.348935	-0.362103	-1.16632	-1.99075	0.235031	-1.14845	-1.63712	-2.2588	-0.399628	-2.00615	-1.89584	-1.16081	-2.50687
J1058	2_two	FW14N	1_FW	2_14	1_norm	live	-0.934068	-0.232706	-0.363125	-1.95176	-1.4444	-1.51888	-0.234912	-0.471619	-1.97277	-0.490962	-1.01838	-1.21145	-1.2825	-0.187129	-1.10819	-0.0508419	0.308637	-0.920569	-0.176378	-0.734457	1.26028	-1.36385	-1.04075	-0.52681	-1.12804	-1.02897	-0.663613	-1.60439	-0.872954
J1059	2_two	FW14N	1_FW	2_14	1_norm	live	-0.342508	0.468898	-0.357743	0.190329	0.370541	-1.56566	-0.418123	0.0144308	-0.0446112	-0.0146102	-0.911369	-0.579732	-1.90859	0.0134211	0.0482929	0.431112	-0.640301	-0.248407	-0.344013	-0.826281	-0.492292	-0.455586	-0.331135	0.406837	-1.58826	-0.609901	-0.238759	-1.22987	0.286215
J1071	2_two	FW14N	1_FW	2_14	1_norm	live	-0.818539	-0.696366	-0.662122	0.248618	0.250478	-1.89937	-0.564622	0.303631	-0.394305	-0.128478	-1.03967	-0.456272	-2.26004	-0.0162157	0.100915	0.602584	-0.907981	-0.497291	-0.380827	-0.314313	-1.3014	-0.343126	-0.727065	0.507044	-1.91047	-0.540894	-0.486914	-1.70505	0.665251
J1082	2_two	FW14H	1_FW	2_14	2_hypox	live	-1.75126	-1.64105	-1.95396	-3.06647	-1.88993	-2.86507	-1.91395	-2.01379	-1.73181	-2.36	-0.898948	-1.56685	-1.90652	-1.5642	-2.56948	-1.9025	-1.30002	-1.02446	-1.77155	-1.54359	-1.11277	-1.24394	-2.65037	-2.22194	-3.07906	-2.34073	-2.44783	-0.710803	-2.79612
J1083	2_two	FW14H	1_FW	2_14	2_hypox	live	-0.408522	0.248458	-0.801349	-0.431186	0.418515	-0.868591	-0.691499	-0.532097	0.701703	-0.510183	-0.401805	-0.466951	-2.5461	-0.578359	-0.539795	-0.0820817	-0.863858	0.294591	-0.843209	-1.3514	-1.71336	-0.511126	-0.234675	-0.248231	-1.28864	-0.88763	-0.452261	-0.994409	-0.148603
J1095	2_two	FW14H	1_FW	2_14	2_hypox	live	-0.407444	-0.275611	-0.790807	-0.164869	0.624261	-1.09729	-0.991675	0.0138989	0.845268	-0.663611	-0.597487	0.199105	-2.22462	-0.495158	-0.341617	-0.490996	-0.616035	0.364855	-0.779728	-0.992695	-0.74331	-0.154346	-0.149021	-0.511559	-0.739669	-1.13447	-0.572538	-0.89795	0.552279
J1106	2_two	FW18N	1_FW	3_18	1_norm	live	-1.49285	-1.6023	-1.28143	-2.80128	-2.10682	-2.69268	-1.1362	-1.13606	-2.55219	-1.48362	-1.66142	-2.41147	-1.86726	-1.15163	-2.34528	-0.211939	-0.572538	-1.82249	-1.18491	-2.26465	0.567983	-1.25924	-1.97425	-2.09554	-3.89593	-2.1003	-2.24963	-2.25783	-3.689
J1107	2_two	FW18N	1_FW	3_18	1_norm	live	-0.95735	-2.85018	-1.68457	-0.86138	0.234825	-2.44717	-1.66001	-0.655389	0.412406	-1.13546	-1.07702	-0.512099	-3.15836	-1.1162	-1.40014	-0.869414	-1.36945	-0.624662	-1.56341	-2.17307	-1.84952	-0.912805	-0.902917	-0.654312	-1.61045	-1.80416	-1.38728	-1.3792	-0.458947
J1118	2_two	FW18N	1_FW	3_18	1_norm	live	-0.410347	-1.15803	-1.88105	-2.47903	-1.06487	-5.44948	-0.0665471	-0.24639	-1.14141	-0.0753401	-2.43751	-0.800857	-1.43425	0.510907	-1.44382	1.15164	0.381714	-2.53631	-0.22975	-1.32015	0.97592	-0.0225683	-1.62074	-1.36515	-5.18961	-1.23499	-3.70986	-2.55349	-7.66164
J1119	2_two	FW18N	1_FW	3_18	1_norm	live	-0.212092	-0.160048	-0.492004	0.351377	1.18182	-0.993582	-0.444055	-0.496985	0.639953	-0.203606	-0.00130976	-0.746768	-1.943	-0.0834779	0.16533	0.383367	-0.511047	-0.00248843	-0.480774	-1.18825	-0.798035	-0.423554	-0.640707	-0.174344	-2.0458	-0.954464	-0.338018	-1.10157	0.608618
J1127	2_two	FW18H	1_FW	3_18	2_hypox	live	-0.00936202	-0.201538	-0.59854	0.438367	0.682779	-0.730611	-0.481629	-0.0726701	1.23605	-0.111988	-0.660963	-0.0243746	-2.00535	-0.444333	-0.115808	-0.21741	-0.536843	0.145424	-0.620059	-0.980705	-1.01925	0.100755	-0.235103	-0.770737	-2.41874	-0.70031	-0.183132	-1.09315	0.679239
J1132	2_two	FW18H	1_FW	3_18	2_hypox	live	-0.896796	-1.22517	-1.47806	-3.09892	-1.42027	-2.86514	-0.653948	-0.857301	-1.21141	-0.951937	-2.39041	-0.606471	-1.25503	-0.708873	-2.07293	0.348577	0.0997944	-1.69428	-0.928	-1.52214	1.11884	-0.393516	-2.45748	-1.96645	-3.80784	-1.5083	-2.3827	-1.31528	-4.9459
J1142	2_two	FW18H	1_FW	3_18	2_hypox	live	-0.692608	-1.86538	-0.715088	-2.29465	-1.53056	-2.37503	-0.348829	-0.64971	-1.76202	-0.451873	-1.98039	-1.4862	-1.26758	-0.328117	-1.45679	0.393384	0.142928	-1.34357	-0.406956	-0.474096	1.46624	-0.162197	-1.10685	-1.18201	-2.80175	-1.52434	-1.78774	-1.45089	-3.63105
J1143	2_two	FW18H	1_FW	3_18	2_hypox	live	-0.889659	-2.45268	-0.987191	-0.349881	0.413932	-1.09675	-1.01514	-0.358578	0.557764	-0.75335	-0.688349	0.227271	-2.30621	-0.690519	-0.374718	-0.149448	-1.78402	-0.366129	-0.906332	-0.394362	-0.960902	-0.755377	-0.736907	-0.414349	-1.76165	-1.26237	-0.63833	-1.0779	0.0393933
J1154	2_two	BW10H	2_BW	1_10	2_hypox	live	-0.318042	0.200076	-0.79832	-0.108107	-0.344931	-1.63355	-0.821176	0.122313	0.418052	-0.449365	-0.399164	-0.528808	-2.38326	-0.562399	-0.462876	-0.215849	-1.66589	-0.00679512	-0.470784	-0.996357	-1.52192	-0.361366	-0.285546	0.291648	-0.815771	-1.06187	-0.279953	-1.1102	-0.0315658
J1155	2_two	BW10H	2_BW	1_10	2_hypox	live	-1.45277	-1.55303	-1.53749	-3.07976	-2.98269	-1.81921	-1.37344	-1.20795	-2.80029	-2.0422	-1.07016	-2.41084	-2.14491	-1.59944	-2.41482	-0.757918	-1.66521	-1.07625	-1.26427	-2.47758	-0.043361	-1.36801	-2.23176	-1.79338	-1.798	-2.37965	-2.05933	-1.36456	-2.73978
J1165	2_two	BW10H	2_BW	1_10	2_hypox	live	-0.511307	-1.46288	-0.60666	0.17226	-0.377162	-1.36558	-0.465199	0.236849	0.246134	-0.21213	-0.699869	-0.515758	-2.07614	-0.196076	-0.117145	-0.0767807	-0.724259	-0.0483778	-0.349739	-0.702004	-0.4963	-0.46798	-0.458576	0.476517	-1.57171	-0.568474	-0.0507875	-1.04132	0.369624
J1178	2_two	BW10N	2_BW	1_10	1_norm	live	-1.14684	0.328159	-0.731293	0.19201	-0.190188	-1.65571	-0.499112	-0.178574	0.0626674	-0.585378	-0.907334	-0.722891	-2.79595	-0.295707	-0.320724	0.180149	-1.2059	-0.421799	-0.508965	-1.98022	-0.699991	-0.975712	-0.577917	-0.0658183	-2.67233	-0.794946	-0.487579	-1.53319	0.375444
J1179	2_two	BW10N	2_BW	1_10	1_norm	live	-1.26389	-0.671662	-0.590679	-2.2344	-2.45946	-1.92556	-0.655515	-0.555462	-2.49711	-1.76018	-1.59644	-2.09867	-1.64674	-0.844223	-1.88297	0.219833	-0.319977	-0.951013	-0.417047	-0.764384	0.689944	-1.33871	-2.29769	-0.805634	-1.75596	-1.47558	-1.38862	-1.59754	-1.81196
J1190	2_two	BW10N	2_BW	1_10	1_norm	live	-0.78473	-0.170149	-0.730429	0.0739659	-0.554908	-3.14869	-0.88617	-0.562396	0.283942	-0.716374	-1.1468	-1.25312	-2.30153	-0.616436	-0.309193	-0.713024	-1.00518	-0.467783	-0.83061	-0.769671	-2.48767	-1.01946	-0.379684	-0.774647	-3.25389	-1.14299	-0.102477	-1.77766	0.422189
J1202	2_two	BW14H	2_BW	2_14	2_hypox	live	-1.32929	-1.72994	-1.62832	-3.01934	-2.62068	-1.33881	-1.32594	-1.48445	-2.42801	-2.05197	-0.873688	-1.98201	-2.15841	-1.73349	-2.42169	-1.00967	-1.70405	-0.825494	-1.3853	-2.77165	-0.0790924	-1.65097	-2.27695	-1.92876	-0.785549	-2.41684	-2.18534	-1.30428	-2.6721
J1203	2_two	BW14H	2_BW	2_14	2_hypox	live	0.438125	0.337289	-1.13184	0.248534	0.557091	-2.59136	-0.443662	0.399201	0.878656	0.0651689	-0.155284	0.219715	-2.70348	0.0178099	-0.513958	-0.822259	-0.472164	0.305484	-0.498498	-0.691393	-1.88055	0.496122	-0.0237734	0.280486	-0.987122	-0.58103	-1.26802	-1.34088	1.09981
J1215	2_two	BW14H	2_BW	2_14	2_hypox	live	0.338678	0.269638	-0.869607	0.347386	0.58232	-1.70573	-0.482682	0.329248	1.18873	-0.157325	0.0249624	0.644586	-2.17617	0.24745	0.235773	-0.775141	-0.446005	0.586327	-0.544317	-0.710108	-0.492348	0.606712	-0.0871701	0.0594749	-1.51086	-0.418755	-1.21417	-1.20581	0.670647
J1226	2_two	BW14N	2_BW	2_14	1_norm	live	-1.32389	-2.40991	-1.13156	-2.86231	-2.32536	-1.7409	-0.98692	-1.40503	-2.32044	-1.82583	-2.01348	-1.92495	-1.87258	-1.43702	-1.96746	-0.371223	-0.516021	-0.99705	-1.2184	-2.1629	0.219495	-1.18416	-2.85956	-2.03404	-1.8212	-2.28132	-2.28745	-1.60337	-3.32944
J1227	2_two	BW14N	2_BW	2_14	1_norm	live	-0.428045	0.162037	-0.933816	0.35937	0.390351	-1.75978	-0.713469	0.353895	0.761161	-0.531203	-0.836638	-0.402252	-2.30659	-0.0531724	0.0746016	-0.767509	-0.518914	-0.0752754	-0.692447	-1.0639	-0.915534	-0.635151	-0.0955201	0.21295	-1.55506	-0.540393	-0.92533	-1.51637	0.501583
J1239	2_two	BW14N	2_BW	2_14	1_norm	live	0.0755589	0.490695	-0.794029	0.173209	0.469797	-1.89014	-0.377539	0.157002	0.93258	-0.0192837	-0.635828	0.0003333	-2.09704	0.336065	0.0193748	-0.557302	-0.44235	0.429199	-0.603628	0.386401	-0.56544	0.472246	-0.0278556	0.131136	-1.98184	-0.352602	-1.04787	-1.31546	0.477736
J1249	2_two	BW18H	2_BW	3_18	2_hypox	live	-1.30072	-1.69935	-1.45866	-0.948263	-1.10204	-1.8415	-1.28624	-0.857661	-0.253108	-1.00114	-1.3872	-1.77553	-2.77109	-1.50309	-0.57273	-0.342076	-1.38906	-0.86367	-1.42725	-2.17478	-1.19805	-1.05102	-1.23781	-0.662645	-1.77759	-1.76713	-1.16254	-1.53475	-0.829666
J1252	2_two	BW18H	2_BW	3_18	2_hypox	live	-1.81151	-2.27468	-2.10089	-3.24518	-2.85722	-1.59954	-1.65701	-1.8214	-1.82185	-2.69726	-1.73504	-1.83681	-2.16378	-2.28122	-2.63579	-0.823423	-1.72538	-1.26692	-1.99507	-1.91409	0.192556	-1.61047	-2.72847	-1.91058	-1.35097	-2.71255	-2.8559	-1.73294	-3.13162
J1263	2_two	BW18H	2_BW	3_18	2_hypox	live	-0.798281	-2.6721	-1.03397	-0.334453	-0.183054	-1.40184	-1.15248	-0.729267	0.369576	-0.568783	-0.759815	-0.603999	-2.1873	-0.748911	-0.666274	-0.176579	-0.991238	-0.450496	-1.1585	-1.64541	-1.41208	-0.940946	-0.584872	-0.919912	-1.98995	-1.41124	-0.676426	-1.33558	0.00344112
J1274	2_two	BW18N	2_BW	3_18	1_norm	live	-1.24204	-2.98774	-1.59752	-3.22955	-2.51742	-1.60867	-1.67145	-2.25105	-1.93352	-1.854	-2.26723	-2.20957	-2.09496	-1.68055	-2.41472	-1.45674	-0.495691	-0.978828	-2.06021	-2.65377	-0.16767	-1.92823	-2.62307	-2.90723	-1.4307	-2.59925	-2.26412	-1.21828	-3.17071
J1275	2_two	BW18N	2_BW	3_18	1_norm	live	-0.740486	-9.13354	-0.935151	-0.513663	-0.0255873	-1.57828	-1.09271	-0.425855	0.366492	-0.736941	-0.67963	-0.7401	-2.5659	-0.777105	-0.516617	-0.127478	-0.996066	-0.432411	-1.12633	-2.57104	-2.07596	-0.928708	-0.807007	-1.21821	-3.26047	-1.37916	-0.781841	-1.35075	-0.830195
J1285	2_two	BW18N	2_BW	3_18	1_norm	live	-1.29422	-2.69175	-1.73264	-1.44352	-0.829817	-1.85788	-1.83232	-1.32318	-0.165421	-1.6566	-1.03916	-1.32317	-2.95934	-1.65298	-0.932544	-1.23438	-1.44226	-0.643373	-1.77896	-2.28929	-1.96252	-1.0944	-1.18226	-1.71898	-2.85184	-1.88026	-1.45792	-1.65549	-0.819895
J1298	2_two	SW10H	3_SW	1_10	2_hypox	live	-0.894312	-1.07324	-0.932369	-2.6167	-2.21649	-1.57392	-0.664794	-0.960989	-2.20596	-1.51725	-1.2984	-1.75035	-1.78292	-1.25686	-1.92364	-0.176644	-0.5039	-0.669608	-0.853661	-1.57813	0.369307	-0.904639	-2.07381	-1.36341	-0.729461	-1.99061	-1.68222	-1.25648	-1.88604
J1299	2_two	SW10H	3_SW	1_10	2_hypox	live	-0.39695	-1.64078	-1.15101	-0.297994	-0.168259	-3.14729	-1.22859	0.522606	0.98555	-1.31367	-0.214074	0.743378	-2.29015	-0.644588	-0.41012	-1.40845	-1.57294	-0.848413	-0.649627	0.165851	-1.59252	-0.451032	-0.89719	0.732865	-0.499751	-1.17409	-0.753405	-0.774731	0.785634
J1311	2_two	SW10H	3_SW	1_10	2_hypox	live	-0.101556	-0.560381	-1.07209	-0.176639	-0.150894	-0.885222	-0.943409	-0.741217	0.647616	-0.877336	-0.247073	-0.809892	-2.21113	-0.677651	-0.415685	-0.48997	-0.785164	0.0702737	-1.1348	-1.35224	-1.02359	-0.153334	-0.703707	-0.400972	-0.377742	-1.27367	-0.722522	-0.644904	-0.234904
J1322	2_two	SW10N	3_SW	1_10	1_norm	live	-0.883838	-2.21892	-0.711443	-1.96778	-1.80398	-1.63479	-0.444918	-0.556842	-1.86133	-1.63562	-0.800534	-1.04395	-1.35888	-1.1148	-1.86139	0.0463332	-0.213889	-0.664001	-0.9221	-0.67135	0.357529	-1.03979	-2.42057	-1.73656	-0.897452	-1.80166	-1.55761	-0.910976	-1.77785
J1323	2_two	SW10N	3_SW	1_10	1_norm	live	-0.172717	-1.78736	-0.481578	0.299974	0.00543663	-1.02361	-0.414362	0.187321	0.531299	-0.601207	-0.650238	-0.767597	-2.22118	-0.252519	-0.113045	-0.201765	-0.67788	0.0759093	-0.410449	-0.182275	-1.27028	-0.423131	-0.0738358	0.215503	-1.64711	-0.748238	-0.276035	-0.959292	0.693672
J1335	2_two	SW10N	3_SW	1_10	1_norm	live	-0.451478	-10.6479	-0.462076	0.00265947	-0.105917	-1.36081	-0.378784	-0.0140638	0.467888	-0.408456	-0.64961	-0.567993	-2.16202	-0.280941	0.366827	0.0548843	-0.762748	0.127711	-0.65505	-1.39245	-0.617233	-0.623221	-0.810573	-0.163254	-1.65672	-0.848275	-0.39264	-0.933206	-0.0453204
J1344	2_two	SW14H	3_SW	2_14	2_hypox	live	-1.61922	-1.34902	-1.42572	-2.99482	-2.63564	-1.72395	-1.24802	-1.22544	-2.08241	-1.85324	-1.81787	-1.78302	-2.17352	-1.5327	-2.34908	-0.0720376	-0.590319	-1.02179	-1.01199	-1.81134	-0.682734	-1.45948	-2.03253	-1.32252	-0.850751	-2.0331	-1.83099	-1.13575	-2.25021
J1347	2_two	SW14H	3_SW	2_14	2_hypox	live	-0.270528	-1.78282	-0.791522	-0.331865	-0.0881672	-1.34008	-0.551855	-0.58132	0.631122	-0.324132	-0.13056	-0.368923	-2.68045	-0.543383	-0.301985	-0.235984	-0.415105	0.137511	-0.623464	-1.39603	-1.24279	0.0231648	-0.0379831	-0.18383	-0.703012	-1.36781	-0.663096	-1.01896	-0.438009
J1359	2_two	SW14H	3_SW	2_14	2_hypox	live	-0.272709	-0.441198	-1.00236	-0.15916	0.242795	-1.71766	-0.867359	-0.924228	0.788658	-0.472653	-0.287824	-0.534546	-2.17432	-0.754708	-0.529415	-0.367596	-1.35892	-0.26522	-0.925798	-0.862293	-1.44804	-0.709182	-0.527582	-0.473123	-1.23553	-0.902642	-0.283099	-0.644901	0.0174022
J1366	2_two	SW14N	3_SW	2_14	1_norm	live	-0.859326	-1.27436	-1.06238	-2.71038	-1.96244	-1.42782	-0.855153	-0.86325	-1.73368	-1.59939	-1.45572	-1.66056	-1.4216	-1.26784	-2.19113	0.189121	-0.135568	-0.859085	-0.907974	-1.7257	0.61514	-0.876645	-1.74233	-1.58059	-1.38279	-1.75708	-1.74248	-0.841937	-2.89277
J1369	2_two	SW14N	3_SW	2_14	1_norm	live	-0.36475	-0.906022	-1.03857	-0.749646	0.169767	-1.47897	-1.34936	-0.557097	0.227979	-1.12577	-0.567799	-0.662843	-2.29585	-0.872311	-0.445846	-0.777591	-1.85951	-0.176498	-1.09885	-1.47418	-2.51062	-0.462236	-0.469373	-2.06761	-2.42136	-1.37144	-0.784748	-1.33086	-0.453967
J1383	2_two	SW14N	3_SW	2_14	1_norm	live	-0.149347	-0.294141	-0.665872	0.112266	0.19968	-1.08815	-0.533596	-0.356767	0.797025	-0.399034	-0.461315	-0.391478	-2.06535	-0.559754	-0.198284	-0.0959348	-1.31875	0.234769	-0.648913	-1.19917	-0.761688	-0.270352	-0.451983	-0.495137	-1.36068	-0.914481	-0.392048	-0.78221	0.185301
J1394	2_two	SW18H	3_SW	3_18	2_hypox	live	-1.09605	-1.73216	-1.56762	-3.50628	-1.99348	-1.39563	-1.23973	-1.73965	-1.9206	-2.64005	-1.33299	-2.04623	-1.83739	-1.856	-2.65841	-0.481514	-0.34735	-1.03418	-1.46542	-3.02724	0.27974	-1.82804	-2.58504	-2.09625	-0.995924	-2.39478	-2.39569	-1.44335	-3.04466
J1395	2_two	SW18H	3_SW	3_18	2_hypox	live	-0.282487	-1.9061	-1.37388	-0.582983	0.10495	-2.04364	-1.09275	-1.10141	0.693392	-0.700325	-0.345193	-0.275881	-2.97608	-1.13846	-1.0064	-1.00059	-0.729909	0.0310187	-1.31615	-1.44302	-1.59491	-0.118271	-0.583001	-0.90256	-1.23866	-1.77281	-1.2487	-0.957984	-0.18789
J1406	2_two	SW18H	3_SW	3_18	2_hypox	live	-0.633809	-2.36746	-1.49991	-0.919628	-0.331767	-1.09404	-1.29954	-1.20083	0.395282	-1.28163	-0.769547	-1.02528	-2.8289	-1.22716	-0.903212	-0.87666	-0.874394	-0.171011	-1.34811	-1.91054	-1.18077	-0.462014	-0.971504	-1.08123	-1.29674	-1.51515	-1.38264	-1.14495	-0.698772
J1418	2_two	SW18N	3_SW	3_18	1_norm	live	-1.06217	-2.34552	-1.41997	-2.68615	-1.22948	-2.54482	-1.42725	-1.83125	-1.69303	-1.65986	-0.065601	-1.30112	-1.21906	-1.1073	-2.12127	-0.936945	-0.3922	-0.774213	-1.31647	-1.46642	-0.530472	-1.10599	-1.58076	-2.17391	-2.32282	-1.95446	-2.14856	-0.11864	-2.39115
J1419	2_two	SW18N	3_SW	3_18	1_norm	live	-0.86853	-0.711549	-1.7178	-1.37342	-0.106521	-1.17493	-1.6721	-0.789896	0.373492	-1.58686	-0.918933	-0.193533	-2.57404	-1.29927	-1.34743	-1.17699	-1.28825	-0.703214	-1.75978	-3.32	-1.43318	-0.653013	-1.08759	-0.496896	-1.92275	-1.45336	-1.55197	-1.13928	-1.08915
J1431	2_two	SW18N	3_SW	3_18	1_norm	live	-0.758137	-0.779738	-1.71727	-1.33591	-0.167641	-1.38921	-1.10901	-0.974654	0.386935	-1.18563	-0.545134	-0.703583	-2.59191	-1.10592	-1.08115	-0.564052	-0.946982	-0.369407	-1.439	-2.54582	-0.822696	-0.414885	-0.878028	-0.772644	-1.16277	-1.45361	-1.40733	-0.954205	-1.28073
J1441	3_three	SW18H	3_SW	3_18	3_ex_hypox	dead	-0.604943	-1.46759	-1.56243	-2.95687	-1.20172	-1.18344	-1.5501	-1.53849	-2.44044	-0.995569	-0.142509	0.103945	-1.26512	-1.65727	-2.06965	-1.17039	0.201219	-1.01996	-2.52246	-1.05	-1.80477	-0.762421	-2.2625	-2.01949	-1.90041	-1.84214	-2.32739	-1.32873	-2.22176
J1442	3_three	SW18H	3_SW	3_18	3_ex_hypox	dead	-0.375678	-1.26329	-1.46492	-2.3854	0.362874	-1.64543	-1.77539	-0.787851	-0.885867	-1.93806	1.85788	2.08938	-0.235262	-1.31623	-2.86808	-1.86116	0.247433	-0.237019	-1.52755	-0.453037	-0.766499	0.369796	-1.48643	-1.53468	-1.75939	-1.69737	-3.37377	0.506898	-1.1839
J1443	3_three	SW18H	3_SW	3_18	3_ex_hypox	moribund	-0.487763	-1.58094	-1.2917	-2.68286	-0.782687	-1.43066	-1.07881	-0.954341	-2.3218	-0.778924	-0.532895	0.945688	-0.881232	-1.7064	-2.07054	-0.0014285	0.658148	-1.26319	-1.3895	-2.18192	0.0873406	0.149849	-1.57154	-2.39054	-2.50841	-1.88927	-2.68833	-1.1946	-4.26797
J1444	3_three	SW18H	3_SW	3_18	3_ex_hypox	moribund	-0.953559	-2.14004	-2.18746	-3.13916	-1.45523	-0.844908	-2.19618	-1.13979	-1.89697	-2.4577	0.283545	1.10748	-1.74836	-2.74047	-2.80796	-0.972737	-0.399775	-0.862853	-2.08202	-1.4587	-0.490361	-0.392689	-2.10699	-2.08037	-0.682572	-2.61896	-3.14597	-0.301588	-2.50964
J1445	3_three	SW18H	3_SW	3_18	3_ex_hypox	dead	-1.14961	-1.62368	-2.32274	-2.77461	-1.196	-1.12161	-1.67126	-1.0957	-2.70113	-2.01726	-0.0698643	0.563	-1.39955	-2.66636	-2.97302	-0.525395	-0.153193	-0.859565	-1.6451	-1.68128	-0.487597	-0.842254	-2.13234	-2.53255	-0.755355	-2.2879	-2.8268	-0.522393	-2.04209
J1446	3_three	SW18H	3_SW	3_18	3_ex_hypox	moribund	0.112608	-2.23341	-0.905369	-1.81661	-0.167152	-0.789108	-1.2049	-1.41605	-1.28624	-0.550656	1.38852	0.581676	-0.0163046	-1.16109	-1.99177	-0.637201	0.22038	0.186106	-1.61663	-1.76195	-1.13712	-0.190159	-1.26559	-1.46525	-1.09612	-1.28788	-1.22008	0.206001	-1.59918
J1447	3_three	SW18N	3_SW	3_18	1_norm	dead	1.87796	0.0926842	0.56463	0.888995	2.01104	3.62826	0.951746	1.23761	1.64929	1.4698	2.41155	2.5963	1.33956	0.5283	1.13039	0.582319	0.983923	0.459334	0.350241	2.50712	1.52631	3.65519	1.24708	1.07979	1.1538	0.399065	-0.0390962	0.802469	0.574362
J1448	3_three	SW18H	3_SW	3_18	3_ex_hypox	dead	-0.570823	-0.956662	-1.60092	-2.88821	-0.762685	-2.42466	-1.3389	-1.2468	-1.45043	-0.744899	0.842519	0.636091	-0.832721	-1.36273	-2.11584	-1.63883	0.0698447	-0.383925	-1.18971	-0.791824	-1.8775	-0.149276	-1.88955	-2.05473	-2.77267	-1.85493	-2.79948	0.105745	-2.03494
J1449	3_three	SW18H	3_SW	3_18	3_ex_hypox	moribund	-0.852582	-2.53271	-2.25392	-4.1837	-1.34988	-1.39092	-3.03381	-2.97976	-2.18274	-2.44202	-0.590453	-0.196161	-1.55265	-2.80531	-3.40458	-2.32971	-0.575736	-1.27181	-3.58457	-2.44652	-3.35468	-1.05153	-2.68301	-2.92848	-1.71785	-2.9186	-3.15108	-0.811621	-3.41461
J1450	3_three	SW18H	3_SW	3_18	3_ex_hypox	dead	-1.12098	-2.03879	-2.27455	-3.28559	-1.60817	-0.694022	-2.05788	-1.77908	-2.02208	-1.72417	0.24704	0.0947458	-1.60979	-2.65551	-2.9567	-1.6936	-0.172785	-1.02375	-2.30204	-2.25825	-2.23227	-0.732897	-2.54783	-2.83704	-0.682917	-2.85298	-3.19102	-0.865628	-3.07646
J1451	3_three	SW18N	3_SW	3_18	1_norm	dead	0.936632	-0.0661275	0.280929	0.735351	0.419759	2.48248	0.286503	0.569526	-0.111403	1.61035	1.28936	0.877624	0.945779	-0.193784	0.774513	0.0992942	1.21803	-0.865404	0.177326	1.13014	0.0462015	1.4766	1.5783	0.776472	0.241846	0.0807274	-0.0178346	-1.2945	0.494241
J1452	3_three	SW18H	3_SW	3_18	3_ex_hypox	moribund	-1.56629	-1.9098	-2.2162	-3.31476	-2.30529	-2.37662	-2.17481	-2.50026	-2.71022	-1.49933	-1.27213	-0.931743	-1.9378	-2.46669	-2.37196	-1.94852	-0.509512	-2.14668	-2.56463	-1.95038	-1.55486	-1.36714	-2.40655	-3.622	-3.37821	-2.55914	-2.51452	-1.54375	-2.81438
J1453	3_three	SW18H	3_SW	3_18	3_ex_hypox	moribund	2.0645	0.12842	0.00798506	0.243712	0.957249	1.86543	0.312624	1.24288	0.618989	1.09805	2.77696	2.9613	1.85358	0.0575099	0.215914	0.349276	1.04476	1.2132	0.717082	0.512192	0.257151	1.4333	0.887822	-0.496943	-1.28264	1.25487	-0.257339	1.63079	1.84765
J1454	3_three	SW18H	3_SW	3_18	3_ex_hypox	live	1.12917	-2.57397	-0.312448	-0.0511347	0.298192	2.60894	-0.507422	-0.109971	-0.555166	0.406599	0.865872	0.710351	0.318756	-0.7585	-0.278645	-0.408967	0.977281	-0.338392	-0.874416	1.40251	-0.470955	2.37122	0.929156	-0.112985	1.16224	-0.493195	-0.689193	-1.05955	-0.846105
J1455	3_three	SW18H	3_SW	3_18	3_ex_hypox	live	0.89437	0.248903	0.462287	0.932224	0.641153	2.67591	0.531991	0.857343	0.282472	1.09559	0.444813	0.375235	0.717468	0.738341	1.04669	0.979364	1.18791	-0.495551	0.565988	1.46896	1.52046	1.98132	1.61687	1.24885	0.992721	0.367519	0.731747	-0.792148	0.626375
J1456	3_three	SW18H	3_SW	3_18	3_ex_hypox	live	0.731526	0.0994644	0.239757	0.463844	0.410544	1.88327	0.613607	0.84554	0.331797	0.847841	0.276201	0.805153	0.151617	0.556112	0.556703	0.469092	1.19915	-0.571878	0.590781	1.01559	1.11278	2.10981	1.66125	1.19461	0.573769	0.370557	0.529465	-0.438285	0.478837
J1457	3_three	SW18H	3_SW	3_18	3_ex_hypox	live	0.838161	0.879899	0.566588	0.896348	0.895959	2.44743	0.883599	1.40479	0.712945	1.33091	0.131549	0.893484	0.741235	1.091	1.31127	1.16346	1.27167	-0.0584981	0.946574	0.472706	1.50251	1.26751	2.0377	1.7553	1.1972	0.954995	0.912817	-0.073491	1.01024
J1458	3_three	SW18H	3_SW	3_18	3_ex_hypox	live	1.07556	-1.04326	0.161746	0.420911	1.26395	2.55655	0.460017	0.867405	0.989809	0.826454	1.22071	0.785606	0.572829	0.524594	0.645568	0.5863	1.37553	0.144779	0.260581	1.69332	1.31735	2.54947	1.70507	1.06743	1.365	0.461137	0.453908	0.103746	0.5644
J1459	3_three	SW18H	3_SW	3_18	3_ex_hypox	live	0.721282	0.221067	0.226044	0.120243	0.375403	2.06568	0.596794	1.11965	0.385207	0.69143	0.368061	0.357659	0.493714	0.510274	0.503354	0.394495	1.11635	0.0695858	0.330964	0.229116	1.1365	1.901	1.11292	0.965993	0.591618	0.40367	0.389763	0.000650216	0.430282
J1460	3_three	SW18H	3_SW	3_18	3_ex_hypox	live	0.789243	0.255526	0.273189	0.454788	0.588145	1.98889	0.888269	1.15478	0.312422	0.936326	0.0407443	0.687747	0.587549	0.677526	1.07622	0.729857	1.20584	0.00620551	0.496009	1.9687	1.16833	2.06725	1.4955	1.06977	0.607486	0.368177	0.362663	0.0392046	0.303772
J1461	3_three	SW18H	3_SW	3_18	3_ex_hypox	live	1.44745	-1.39383	0.751722	0.890028	1.16332	2.74553	0.932361	0.833941	0.694747	1.20394	1.48338	1.36928	0.605103	0.573484	1.01219	0.769216	1.55271	0.351692	0.107473	1.3453	1.17902	2.60615	1.63373	0.944053	0.996419	0.248714	0.292188	0.609501	0.239221
J1464	3_three	SW18H	3_SW	3_18	3_ex_hypox	live	0.639083	0.73549	0.568474	0.659571	0.398572	2.09365	1.04914	1.01454	0.541302	1.24137	0.21423	0.511569	0.512227	0.888692	0.973003	1.10276	1.19816	-0.636626	1.05214	1.45566	1.54934	1.59177	1.91148	1.79227	0.685917	0.762108	0.834933	-0.131099	1.19302
J1465	3_three	SW18H	3_SW	3_18	3_ex_hypox	live	0.640293	0.637312	0.77561	0.924764	0.632519	2.06477	1.0707	1.01626	0.566179	1.25216	0.0313566	0.705588	0.755329	0.847483	1.29184	0.949139	1.25032	-0.209663	0.678251	0.311252	1.42205	0.800328	1.70917	1.27816	1.18294	0.456326	0.672172	-0.591472	0.798419
J1466	3_three	SW18H	3_SW	3_18	3_ex_hypox	live	0.935791	0.642395	0.359938	0.549968	0.854177	2.1235	0.935223	1.3394	0.791776	1.08283	0.0665228	0.976099	0.583397	0.797083	0.953598	0.775476	1.11587	0.147828	0.723448	1.41396	1.61043	1.13359	1.83045	1.49412	0.98166	0.606416	0.702215	-0.0340307	0.720657
J1471	3_three	FW14H	1_FW	2_14	2_hypox	moribund	1.19865	-1.28034	-1.08153	-0.982513	0.794032	1.73567	-0.609102	0.236044	0.433284	-1.02141	1.20271	1.33899	1.05075	-0.458816	-1.0057	-0.43657	-0.0767058	1.99667	-0.0374517	-0.829529	-0.0433966	0.846734	-0.0921891	-1.46027	0.511718	0.419075	-0.862156	0.96652	0.753433
J1478	3_three	SW14H	3_SW	2_14	2_hypox	dead	1.24772	1.20676	0.516235	1.0106	0.420897	0.937404	1.09848	0.544647	0.414753	0.968562	1.92529	2.95336	1.41744	0.517964	0.534229	1.07838	-0.224279	1.04595	1.24857	0.708839	-0.456832	0.926079	0.856338	-0.219263	-0.00468874	0.886369	0.0546745	1.03963	2.30353
J1479	3_three	FW14H	1_FW	2_14	2_hypox	moribund	-0.0428427	-0.447866	-1.40996	-1.227	-0.110014	1.09777	-0.646975	-0.458186	-0.2897	-1.36934	1.80406	0.519141	0.184643	-1.40824	-0.0291002	-0.849667	-0.667374	1.17203	-0.456814	-1.73403	-0.693673	0.209507	-1.50935	-1.57458	-0.0745191	-0.422614	-1.29102	0.259015	0.281007
J1480	3_three	SW14N	3_SW	2_14	1_norm	moribund	1.5634	0.586402	-0.261268	-0.269339	0.676594	1.04959	-0.267029	0.835297	-0.354785	0.667525	1.87586	1.79473	1.21804	-0.272623	-0.402082	0.32893	0.698618	0.833081	0.551616	0.432948	0.023166	1.1291	0.990005	-0.552197	-0.46871	0.979358	-0.389867	0.621982	1.78463
J1481	3_three	FW14N	1_FW	2_14	1_norm	moribund	1.52779	0.00944578	-0.892773	-0.674982	1.59157	1.9391	-0.494914	-0.119654	0.347287	-0.342668	2.74477	1.80533	1.14748	-0.481461	0.354223	-0.534333	-0.0412398	1.88111	0.60289	-1.35341	-1.62965	1.15375	0.455225	-1.11483	1.44361	0.525993	-0.772013	0.902768	0.732086
J1482	3_three	FW14N	1_FW	2_14	1_norm	moribund	0.442761	-0.264788	-0.731084	-0.515603	0.0155226	0.988479	-0.449308	-0.407286	-0.32828	-1.1661	1.67701	1.16889	0.593971	-0.813683	0.596113	-0.56827	-0.234949	1.1345	-0.217342	-1.2666	-0.563698	0.231903	-0.471277	-1.64302	0.592898	-0.318189	-1.11026	0.117264	0.438646
J1483	3_three	FW14H	1_FW	2_14	2_hypox	dead	0.831652	-0.0325563	-0.914037	-1.04012	0.56431	2.1762	-0.382742	-0.154189	1.64586	-1.39055	2.63848	2.33853	0.801481	-0.962578	1.40079	-0.434047	-0.129177	2.81549	0.354388	-1.11218	-0.939209	1.20867	0.00707686	-0.748688	2.88331	0.0169684	-0.827822	1.27016	0.543785
J1486	3_three	BW14H	2_BW	2_14	2_hypox	dead	2.1155	0.492994	0.245136	0.0292847	0.573269	2.2241	0.581632	0.670261	0.718451	0.498476	3.04127	3.26673	1.44548	-0.0448211	0.114025	0.504563	1.01194	1.79951	0.648826	0.379601	-3.04766	1.77908	0.756529	-1.37706	-0.494371	0.360821	-0.995306	1.94776	2.11095
J1487	3_three	SW18N	3_SW	3_18	1_norm	dead	0.496157	-1.68776	-0.0657876	0.00730338	0.217708	1.52856	0.266025	-0.102587	-0.159028	0.795998	-0.0291358	0.567853	0.397249	-0.29998	0.540514	0.287079	1.24324	-1.34071	0.000639454	0.998903	0.750927	0.669462	0.812833	0.622057	1.11271	-0.085904	-0.0931617	-1.14226	-0.250514
J1490	3_three	FW10N	1_FW	1_10	1_norm	moribund	1.13979	0.725647	-0.471948	-0.182432	1.37998	1.81312	0.0668404	-0.0617449	-0.296922	-0.360569	2.11666	1.26104	1.18988	-0.360453	0.251791	-0.324253	-0.224422	1.61263	0.630505	-0.261288	-0.0529244	0.747908	0.308252	-1.19833	-0.531174	0.710181	-0.190297	0.478531	1.54538
J1491	3_three	FW18N	1_FW	3_18	1_norm	dead	1.1363	0.704404	-0.368723	-0.0639042	1.00776	1.91587	0.203265	0.760398	0.214061	-0.105407	1.53367	1.54561	1.1376	0.00489356	0.130329	0.402482	-0.489527	1.83027	0.762785	-0.0664817	0.369086	0.666976	0.518939	-0.523823	-0.083912	0.729182	-0.00184404	0.715296	1.57915
J1492	3_three	FW18N	1_FW	3_18	1_norm	dead	0.472012	-0.419558	-0.669032	-0.263183	0.10054	1.54347	0.193654	0.543092	0.0214718	-0.408192	1.14517	1.48735	0.865107	-0.140893	-0.0168511	0.607401	0.214444	1.26794	0.818965	0.541362	0.496066	0.182002	0.207239	-0.460562	-0.0108931	0.757027	-0.230708	0.310848	1.62893
J1493	3_three	FW18H	1_FW	3_18	2_hypox	dead	0.417771	0.555141	-0.646964	-0.0975098	-0.996318	0.317117	0.399003	0.661861	0.521461	-0.33131	0.408475	2.61891	0.678726	-0.410114	-0.210082	0.256154	0.299316	1.51408	0.793639	-0.307736	0.282987	0.434753	0.715374	-0.0612765	0.279412	0.213479	-0.574677	0.828138	1.14244
J1494	3_three	SW14H	3_SW	2_14	2_hypox	moribund	1.91205	-0.568592	-0.354575	0.257163	0.927083	1.9584	0.306503	0.851432	0.24198	0.457268	2.68893	2.70155	1.62464	-0.270072	-0.360874	-0.178865	0.698714	1.91262	0.302727	-0.731121	-0.455235	1.68732	0.971699	-0.928669	0.755611	0.400234	-1.03012	1.3703	1.33674
J1495	3_three	FW18N	1_FW	3_18	1_norm	moribund	0.491742	-1.04712	-1.44153	-1.03649	0.641912	1.41135	-0.59472	-0.109395	0.196218	-1.05709	1.57552	1.88661	0.649104	-0.953025	-0.0975569	-0.598485	-0.185924	1.31507	0.0836651	-0.928827	-4.45574	0.321122	-0.867148	-1.01921	0.580936	0.0300229	-1.17095	0.286158	0.596981
J1496	3_three	FW10H	1_FW	1_10	2_hypox	moribund	0.997499	0.205921	-1.02635	-0.568157	0.804149	1.98455	-0.403294	0.046107	0.22442	-1.14531	2.50215	1.85908	0.96982	-0.234902	0.238208	-0.24656	-0.271646	2.01099	0.630889	-0.62555	0.12329	0.789381	-0.1602	-0.551373	1.01676	0.661905	-0.738465	0.811956	0.0577224
J1497	3_three	FW10H	1_FW	1_10	2_hypox	moribund	0.378717	-0.599765	-1.97817	-1.64946	-0.160567	-0.159684	-1.15068	-0.342225	-0.0154782	-1.36173	0.372887	2.32613	0.580411	-2.02025	0.354893	-1.46757	-1.34588	2.16246	-0.169613	-2.04836	-1.64624	0.620669	0.826794	-2.21129	-0.240293	-0.399736	-0.714768	0.762152	-0.500394
J1498	3_three	FW10H	1_FW	1_10	2_hypox	moribund	1.53075	0.0759259	-0.965167	-0.459933	1.92557	2.35576	-0.50575	0.317142	0.702293	-1.00972	3.22588	2.23582	1.22635	-0.171843	1.59473	-0.154888	0.238802	2.46558	0.438077	-0.835251	-0.0380702	1.4274	0.48403	-1.5826	1.03034	0.694308	-0.813159	1.45666	0.940916
J1499	3_three	SW10H	3_SW	1_10	2_hypox	moribund	1.52706	1.59272	0.319096	0.768685	-0.247123	1.18394	1.44371	1.37758	0.178741	0.851289	1.4965	1.87792	1.24849	0.930956	0.561542	1.30268	0.608862	1.51747	1.8704	0.884147	1.27704	1.17933	1.22622	1.0058	-0.448443	1.7569	0.768927	1.36527	3.20985
J1500	3_three	FW18H	1_FW	3_18	2_hypox	moribund	0.655701	0.352513	-0.907996	-0.384952	0.482354	1.5995	0.0593888	0.0060288	0.0802105	-0.588166	1.71823	1.30515	0.64203	-0.429617	-0.175737	-0.00954649	-0.162031	1.66367	0.44715	-0.539292	-0.501337	0.337868	-0.354701	-0.966995	0.552313	0.283424	-0.85403	0.443313	1.13181
J1501	3_three	FW18N	1_FW	3_18	1_norm	moribund	1.27564	0.47212	-0.793213	-0.3866	1.1051	1.88253	-0.150123	0.446811	0.0822292	0.0162514	2.4964	1.37664	1.01329	-0.32383	0.571501	-0.192456	0.108265	1.32254	0.656372	-0.882214	-0.616046	1.06728	0.370966	-0.450845	0.709742	0.581694	-0.299068	0.746043	1.44248
J1502	3_three	SW10N	3_SW	1_10	1_norm	moribund	1.49469	1.46578	-0.032363	0.562656	-0.105182	0.542762	0.904706	0.711778	0.134407	0.95672	1.14954	2.42429	1.53292	0.456621	0.00247093	0.619832	0.649413	0.947496	1.60668	0.588181	0.666043	1.02811	1.30211	0.70498	0.425419	1.51222	0.310496	0.852616	2.31652
J1503	3_three	SW18N	3_SW	3_18	1_norm	dead	0.204599	0.363899	0.247661	0.539857	0.182434	1.1657	0.883505	0.632216	0.55976	1.06502	-0.692781	0.528005	0.426477	0.666944	0.93381	0.898271	1.20682	-0.48903	0.772161	0.433242	1.34385	-0.0421591	-0.158506	1.19689	0.873791	0.413042	0.689329	-0.46512	0.878427
J1504	3_three	FW18H	1_FW	3_18	2_hypox	moribund	0.582273	-0.252915	-1.3827	-0.814876	0.625799	1.44997	-0.518017	-0.102139	0.098571	-0.917445	1.88336	1.22993	0.515636	-0.899098	0.460949	-0.566328	-0.145856	1.51426	0.0938707	-0.225835	-0.396011	0.599777	-0.228724	-1.89459	0.492766	0.0725282	-0.947557	0.399735	0.846867
J1505	3_three	SW18N	3_SW	3_18	1_norm	dead	0.123588	-1.11141	-0.621564	-0.173364	0.00928624	1.72836	-0.100461	-0.573586	1.55443	-0.307838	1.04629	1.50393	0.134596	-0.835292	0.254785	-0.795533	0.640947	0.278518	-0.932456	0.363274	0.440583	2.04466	-0.20728	-1.40403	0.662284	-1.18792	-1.58607	0.0112738	-0.738162
J1506	3_three	FW10N	1_FW	1_10	1_norm	moribund	0.273743	-0.905209	-1.56585	-1.62989	-0.0774587	1.06467	-1.21634	-0.683274	-0.998433	-1.87109	2.05089	0.516629	-0.050873	-1.58374	0.78796	-1.5457	-0.843518	0.767931	-0.61321	-2.07309	-1.14144	0.1062	-0.854436	-1.85899	0.346573	-0.670372	-1.44067	0.371841	-0.162034
J1507	3_three	SW10N	3_SW	1_10	1_norm	dead	0.635418	1.08269	0.0359634	0.596661	-0.221483	0.364402	0.518235	0.831841	-0.280494	1.50783	1.87338	2.35181	1.37155	0.440455	0.18922	1.16338	0.550868	0.72383	1.09335	0.395364	0.449202	0.447596	1.22365	-0.167642	-1.4226	0.918691	-0.64271	0.608898	1.41624
J1508	3_three	BW14N	2_BW	2_14	1_norm	moribund	1.33528	0.0702782	-0.713966	-0.540462	0.695712	0.975911	-0.683829	0.165888	-0.391744	0.119046	1.53441	1.9888	1.32726	-0.820751	-0.970668	-0.422502	0.623051	0.539154	-0.181563	-0.0992278	-0.65847	0.962101	0.158053	-1.6138	-1.99543	0.800652	-1.08126	0.16044	1.335
J1509	3_three	SW10H	3_SW	1_10	2_hypox	dead	1.36065	-0.416401	0.310093	0.421313	0.706309	1.21591	0.476898	0.90356	0.179108	0.756309	2.25514	2.2122	1.3585	0.322298	0.334888	0.870351	0.571031	1.45382	0.601035	0.57907	-0.652667	1.1797	1.03995	-0.895698	-0.958176	0.825056	-0.518524	0.894677	1.95132
J1510	3_three	SW14H	3_SW	2_14	2_hypox	moribund	1.47556	0.0152715	-0.59503	-0.56913	0.521324	1.30988	-0.592392	0.354206	0.627503	-0.0669441	2.10061	2.03977	1.18039	-0.461774	-0.656403	0.242507	-0.253741	1.11811	-0.0878359	0.124952	-0.115143	1.45902	0.733382	-1.16792	0.17441	0.510095	-0.808856	1.54389	1.37941
J1511	3_three	SW10H	3_SW	1_10	2_hypox	dead	1.37846	-0.682863	0.369701	0.215389	0.395041	2.07583	0.120933	1.10562	0.802834	0.771071	2.79252	2.54578	1.24802	0.289196	-0.0499475	0.882533	0.385288	1.79803	0.609542	0.805633	0.183224	1.48778	1.03682	-0.10707	-0.893028	0.73655	-0.555736	1.40338	1.99145
J1512	3_three	BW10H	2_BW	1_10	2_hypox	dead	1.21418	0.381702	-0.727446	-0.102388	0.299814	0.135549	0.0493954	0.532476	-0.349982	0.348154	1.72913	2.0031	1.03507	-0.190229	-0.820635	-0.0030893	0.356068	0.898018	1.00642	0.561975	-1.14314	0.687813	1.40835	0.333653	0.19217	1.21005	-0.230891	0.966724	1.75767
J1513	3_three	BW10N	2_BW	1_10	1_norm	moribund	1.45826	0.0361214	-0.700596	-0.561164	0.182633	1.08172	-0.330713	0.124193	0.632901	-0.529862	2.39277	2.35319	1.08174	-0.671951	-0.359855	-0.060716	-0.392781	1.31955	0.0261494	-0.524665	-0.542989	1.21228	0.281045	-0.916966	1.0618	0.34458	-1.23252	1.63611	0.55857
J1514	3_three	BW14H	2_BW	2_14	2_hypox	dead	0.680541	-1.54057	-1.82913	-1.85349	-0.56625	0.806648	-1.65691	-0.509118	0.938797	-1.7328	1.8501	2.53129	0.363063	-1.93953	-1.97666	-1.6364	0.0320066	1.4767	-1.36218	-1.07958	-1.20944	0.769819	-0.370796	-2.69448	-0.227253	-0.134727	-2.06851	0.882335	-0.592496
J1516	3_three	FW14N	1_FW	2_14	1_norm	live	0.0633786	0.0362302	-0.573782	-0.251841	1.02866	-1.14699	-0.530372	-0.0318333	0.70616	-0.304889	-0.375047	-0.149875	-2.08395	-0.11226	-0.125371	0.252371	-0.731279	0.243427	-0.584892	-0.412214	-0.416806	0.411642	-0.0847636	0.110516	-1.16731	-0.679134	-0.604808	-0.899699	0.463539
J1525	3_three	FW14N	1_FW	2_14	1_norm	live	0.324454	-1.79569	-0.134236	0.197961	1.12393	-1.12789	0.0349904	0.252564	0.614475	0.301077	-0.730124	-0.147189	-1.87879	0.236504	0.440148	0.471631	-0.570965	0.0529212	-0.251275	-1.00288	-0.459424	0.0431982	0.133376	0.436806	-1.32032	-0.6678	-0.134133	-0.784094	0.364977
J1542	3_three	FW14H	1_FW	2_14	2_hypox	live	-0.204059	-1.69827	-0.94014	-0.194584	0.411598	-0.953098	-1.1907	-0.180208	0.478249	-0.682692	-1.48173	-0.294015	-2.23523	-0.534419	-0.242739	-0.248196	-1.69415	-0.138612	-0.794429	-0.362749	-0.932465	0.283306	-0.296207	-0.321061	-1.23852	-0.872439	-0.693528	-1.16473	0.0333143
J1545	3_three	FW10N	1_FW	1_10	1_norm	moribund	0.447585	-0.770069	-1.3584	-1.4937	0.544102	1.15625	-1.17567	-0.945191	-0.312555	-1.57458	1.69925	0.987665	0.449426	-1.2697	-0.173962	-1.04327	-1.33021	1.06396	-0.299558	-1.69269	-0.124302	0.40211	-0.311668	-1.89493	1.70363	-0.132728	-1.46982	0.644593	-0.0197368
J1552	3_three	FW14H	1_FW	2_14	2_hypox	live	-0.268767	-0.506878	-1.43222	-0.62532	0.114154	-2.1106	-1.49226	-0.602953	-0.0627227	-0.628635	-1.23225	-0.524723	-3.22041	-0.824018	-1.11327	-0.561379	-1.04514	-0.151346	-1.12189	-0.286053	-1.42337	0.101734	-0.352435	-0.413098	-1.34721	-1.26452	-1.16297	-1.36009	-0.151939
J1559	3_three	BW10H	2_BW	1_10	2_hypox	live	0.138794	-0.194553	-0.746559	-0.225851	0.341365	-0.96257	-0.503647	-0.451951	0.498216	-0.66501	-0.511124	0.0226557	-2.15179	-0.421289	-0.0113271	-0.368739	-0.600205	0.0863745	-0.65536	-1.25088	-0.566198	0.0722503	-0.283369	-0.195629	-1.47262	-0.892044	-0.603417	-0.821797	-0.406953
J1566	3_three	SW14H	3_SW	2_14	2_hypox	moribund	1.85774	-0.0596165	-0.308565	-0.254467	0.679069	1.84164	-0.379498	0.497883	0.787451	-0.302579	2.32866	2.79939	1.40473	-0.341733	-0.549285	0.0678935	0.5529	1.64117	0.19048	0.416758	-1.11685	1.65308	0.962065	-1.334	-0.314546	0.658659	-0.683525	1.46022	0.964713
J1567	3_three	BW14H	2_BW	2_14	2_hypox	moribund	1.20812	0.193947	-0.569623	-0.46257	-0.143179	1.25664	-0.23938	-0.0610865	0.134716	-0.344302	1.26659	1.36109	1.06208	-0.577074	-0.594127	-0.215399	0.18739	1.22691	-0.0153105	-0.575614	-0.998598	0.890358	0.4318	-1.29013	-0.175112	0.30642	-0.965281	0.858642	0.668753
J1568	3_three	BW14H	2_BW	2_14	2_hypox	moribund	1.50414	-0.992703	-1.89848	-1.45227	0.561827	1.58634	-1.81464	0.132869	1.1423	-1.83647	2.59511	2.6509	0.978826	-1.78435	-2.35478	-1.19117	0.29722	1.18633	-0.973627	-0.531225	-0.786606	1.29782	0.331913	-1.33226	0.126194	0.296135	-1.79811	1.61186	0.142977
J1575	3_three	BW10H	2_BW	1_10	2_hypox	live	-0.845215	0.627692	-0.872532	0.329372	-0.30037	-1.41992	-0.394367	0.131008	-0.104829	-0.139384	-1.35946	-0.33668	-2.56516	-0.0725514	-0.213309	0.0578105	-0.980159	-0.688879	-0.305761	-1.12931	-0.529189	-0.389201	-0.727439	0.489954	-1.5469	-0.593661	-0.455823	-1.44667	0.467848
J1581	3_three	BW10N	2_BW	1_10	1_norm	live	-0.151883	-1.28254	-0.915544	-0.295851	0.686255	-1.04828	-1.48489	-0.905088	0.573245	-0.734759	0.183445	-0.248282	-2.11375	-1.03723	-0.614809	-0.559824	-1.19375	-0.430834	-1.46416	-1.72447	-1.10396	0.204413	-0.20867	-1.89924	-2.55194	-1.64048	-1.30091	-1.17302	-0.384358
J1592	3_three	BW10N	2_BW	1_10	1_norm	live	-0.0486956	-1.06639	-1.46834	-0.564429	0.455223	-3.66628	-1.28539	-1.26176	0.510431	-1.2732	-0.0283499	-0.568393	-2.72204	-1.17177	-0.549991	-1.05085	-0.534642	-0.205438	-1.39932	-1.17379	-2.64328	-0.0545714	-0.214919	-2.1637	-1.77581	-1.69417	-0.982566	-1.61002	-0.656874
J1604	3_three	BW14H	2_BW	2_14	2_hypox	live	-0.206145	-1.3848	-1.25615	-0.0562553	0.219808	-1.7884	-0.924084	-0.027583	0.779094	-0.449793	-0.610486	0.223008	-2.3864	-0.319738	-0.2675	-0.603716	-0.569094	0.115505	-0.853963	-1.54817	-0.905074	0.116403	-1.14791	-0.160068	-1.19899	-0.993272	-1.28022	-1.1415	0.205599
J1618	3_three	BW14H	2_BW	2_14	2_hypox	live	0.12599	0.173434	-1.02726	-0.0462213	0.560872	-1.30652	-0.774804	-0.0326483	1.25952	-0.254067	-0.910092	0.492521	-2.20248	0.0297985	-0.190868	-0.841118	-0.174245	0.343758	-0.77115	-2.11465	-1.69998	0.391486	0.165863	-0.124592	-1.02213	-0.429594	-0.921157	-1.00763	0.111979
J1628	3_three	BW14N	2_BW	2_14	1_norm	live	0.234431	-0.951115	-1.78367	-0.961208	0.84365	-1.58913	-1.56454	-0.675758	0.599513	-1.27787	-0.427134	0.0900283	-2.66044	-0.863655	-1.21514	-1.54723	-1.38485	0.249503	-1.55965	-1.48637	-1.17227	0.425216	-0.246008	-1.21158	-1.15586	-0.944648	-1.67802	-1.31073	-0.797954
J1634	3_three	BW14N	2_BW	2_14	1_norm	live	0.0103967	-0.349808	-0.69703	-0.11238	0.219068	-1.01928	-0.62945	-0.450643	0.630742	-0.356434	-0.518484	-0.357217	-2.16886	-0.579475	-0.027099	-0.123579	-0.517299	-0.0634761	-0.704009	-0.547497	-0.740768	0.469238	-1.39125	-0.0356784	-0.598911	-1.17192	-0.580696	-0.830123	-0.139263
J1649	3_three	BW18H	2_BW	3_18	2_hypox	live	-0.621296	-2.52217	-1.17123	-0.482277	-0.117233	-1.33844	-0.968265	-0.854821	0.547344	-0.703695	-1.04012	-0.560747	-2.50933	-0.749279	-0.376989	-0.473048	-0.86824	-0.318568	-1.14603	-2.02268	-0.877362	-0.338232	-1.10904	-0.754423	-1.38658	-1.23785	-0.963965	-1.1825	-0.359311
J1656	3_three	BW18H	2_BW	3_18	2_hypox	live	-0.175407	-0.943568	-1.21124	-0.679359	0.225792	-0.824815	-1.62189	-1.17488	0.768307	-0.84949	-0.975516	-0.472681	-2.31978	-1.08471	-1.06808	-0.860284	-0.761553	-0.176354	-1.47838	-1.98863	-2.04894	-0.272533	-0.503556	-1.14824	-1.30727	-1.37469	-0.857887	-1.12976	-0.270684
J1674	3_three	BW18N	2_BW	3_18	1_norm	live	-0.382554	-0.906858	-1.3499	-0.966092	0.24946	-1.52095	-1.45759	-1.05551	0.64322	-0.889902	-0.913605	-0.26079	-2.21432	-0.83733	-0.903333	-0.500933	-0.697652	-0.312256	-1.2466	-1.99406	-1.5404	-0.414506	-0.402985	-1.5678	-2.30905	-1.34075	-0.885663	-1.13877	-0.935113
J1682	3_three	BW18N	2_BW	3_18	1_norm	live	-0.0397123	-0.555789	-1.13377	-0.161276	0.283954	-1.71047	-0.803702	-0.476515	0.276318	-0.36666	-0.324892	-0.0721286	-2.61281	-0.799623	-0.824943	-0.298095	-0.614994	0.0294101	-1.06006	-0.56282	-1.22303	0.543273	-0.107249	-0.621431	-1.25647	-1.22272	-0.942821	-1.057	0.149329
J1693	3_three	SW14H	3_SW	2_14	2_hypox	live	-0.350743	-0.616079	-1.27096	-1.02842	0.168595	-1.00574	-1.43791	-0.55675	0.558708	-0.882071	-1.05373	-0.156053	-2.17916	-0.841591	-0.800975	-0.531228	-0.498116	-0.199717	-1.05304	-1.60787	-0.878363	0.107774	-0.224808	-0.55186	-0.975862	-0.887588	-0.610737	-1.00651	-0.435059
J1699	3_three	SW14H	3_SW	2_14	2_hypox	live	-0.108005	-0.403903	-1.16269	-0.396582	0.251286	-1.66806	-0.674039	-0.679948	0.65019	-0.566567	-0.447009	-0.465624	-2.828	-0.875749	-0.334365	-0.711689	-0.718089	-0.0791123	-0.98859	-0.957403	-0.753959	0.356447	-0.148136	-0.496498	-0.73341	-1.25799	-0.863187	-1.05357	-0.0379946
J1718	3_three	SW14N	3_SW	2_14	1_norm	live	-0.104708	-0.285089	-0.825684	-0.521702	-0.018516	-0.842625	-0.599181	-0.156631	0.519808	-0.454125	-0.819168	-0.353304	-2.02313	-0.417321	-0.0012389	-0.0967323	-0.538221	0.0389419	-0.515205	-1.32879	-0.632734	-0.225732	-0.126158	-0.119784	-1.07149	-0.722793	-0.448358	-1.08248	-0.179047
J1729	3_three	SW10N	3_SW	1_10	1_norm	moribund	0.910926	0.775529	-0.34108	-0.159408	0.028006	0.0246842	0.150836	1.12405	-0.367972	1.15936	1.78274	1.86173	1.12187	0.164506	-0.496152	0.617728	0.576363	0.831697	1.30044	0.395097	0.497491	0.504805	1.65698	0.565615	-0.328886	1.47178	-0.0184319	0.767556	2.09678
J1799	3_three	FW18H	1_FW	3_18	2_hypox	live	0.145453	-0.392068	-1.1064	-0.96729	1.08314	-0.407979	-1.08915	-0.580786	1.01689	-0.743552	-0.176935	0.296565	-2.25291	-0.583724	-0.631105	-0.372693	-0.614932	0.19218	-0.924472	-1.16514	-0.539887	0.511175	-0.329592	-0.403701	-0.10401	-1.03269	-0.980642	-0.707467	-0.51914
J1814	3_three	SW10H	3_SW	1_10	2_hypox	live	-0.462247	0.245529	-0.607884	-0.0337549	0.0754632	-1.2566	-0.570811	0.0420024	0.230453	-0.225232	-0.552058	-0.298077	-1.95823	-0.0858009	0.142981	0.0330866	-0.594415	-0.152458	-0.2891	-0.464085	-0.352293	-0.285304	-0.0488833	0.687951	-1.06894	-0.554973	-0.361461	-1.23723	0.693908
J1823	3_three	SW10H	3_SW	1_10	2_hypox	live	-0.36432	-2.02034	-0.58937	0.0461081	-0.0638869	-1.37744	-0.809895	-0.407981	0.409054	-0.517581	-1.3524	-0.489314	-2.2297	-0.334987	0.0666332	-0.435709	-0.763507	-0.404589	-0.645659	-0.828336	-0.811616	-0.110963	-0.806236	-0.225849	-1.21961	-1.06148	-0.82683	-1.61868	0.261372
J1835	3_three	SW10N	3_SW	1_10	1_norm	live	-0.252165	0.123049	-0.329483	0.321988	0.13725	-1.61789	-0.0264903	-0.425791	0.358932	-0.00644754	0.00153191	-0.297252	-2.02115	0.0547009	0.309135	0.165982	-0.312676	-0.421895	-0.468278	-0.76519	-0.493751	-0.296435	0.00279245	0.278137	-1.55781	-0.784291	-0.238771	-0.9652	0.787695
J1852	3_three	SW10N	3_SW	1_10	1_norm	live	-0.197674	0.00997428	-0.450751	0.250693	0.238055	-1.92435	-0.733148	-1.06968	-0.0103568	-0.357693	-1.07836	-0.796451	-2.19219	-0.634158	0.042301	-0.462029	-0.767399	-0.814519	-0.977304	-0.401158	-1.89211	-0.649393	-0.589432	-0.441745	-1.88584	-1.22131	-0.397992	-1.43292	0.0243327
J1854	3_three	SW18N	3_SW	3_18	1_norm	live	0.671887	-2.03084	-0.287462	-0.297953	0.534655	2.28546	-0.191327	-0.582165	0.411242	-0.182486	0.194985	0.0668407	0.253487	-0.155095	0.151807	-0.0983414	0.726041	-0.729046	-0.649616	-0.941036	1.12225	1.15497	0.650598	-0.3801	1.05262	-0.538823	-0.386084	-0.817888	-1.0321
J1855	3_three	SW18N	3_SW	3_18	1_norm	live	0.519602	-1.08886	-0.392154	-0.448358	0.230973	2.17987	-0.366586	-0.625829	0.483978	-0.377212	0.160075	0.177817	-0.162841	-0.463221	-0.212727	-0.440835	0.603196	-0.901144	-0.735344	-0.797512	0.31923	1.3234	0.317354	-0.429484	1.12145	-0.723937	-0.698819	-0.637287	-1.25328
J1857	3_three	SW18N	3_SW	3_18	1_norm	live	0.260138	-2.39429	-0.704227	-0.76528	0.105092	2.11016	0.0230807	-0.601778	0.666116	-0.660383	-0.204477	0.107345	-0.0417098	-0.72643	-0.519	-0.882206	0.51552	-0.766123	-0.815412	-0.177135	0.335061	1.43152	0.12531	-0.232373	0.991101	-0.78115	-0.798324	0.215378	-0.854001
J1858	3_three	SW18N	3_SW	3_18	1_norm	live	0.640019	-1.00322	-0.371472	-0.725073	0.572621	1.94924	-0.221837	-0.422517	0.468421	-0.405098	0.670257	-0.181333	-0.0966918	-0.2584	0.248245	-0.575348	0.325354	0.180515	-1.08995	-0.600581	0.807256	0.663487	-0.434928	-0.73547	0.80596	-0.736478	-0.772233	0.673474	-1.29598
J1859	3_three	SW18N	3_SW	3_18	1_norm	live	0.505113	-1.0948	-0.0132557	0.0658065	0.104558	2.19214	0.373628	-0.0679043	0.778317	0.172102	0.578426	0.179378	0.239614	0.0263679	0.547705	0.0179478	0.335328	-0.204842	-0.11546	1.05746	0.957953	1.92368	0.531859	0.320444	1.39373	-0.581749	-0.251628	-0.00778065	-0.0701781
J1863	3_three	SW18N	3_SW	3_18	1_norm	live	-0.667895	-2.43086	-0.591852	-0.819521	-1.05456	0.761492	-0.495832	-0.917545	-1.27506	-0.270306	-0.846525	-1.32309	-0.196876	-0.890859	-0.0485865	-1.33167	-0.0469419	-1.192	-0.935325	-0.696464	-0.0274993	-0.0743783	0.170061	-0.841448	-0.409779	-1.4997	-1.05056	-2.61713	-1.82325
J1864	3_three	SW18N	3_SW	3_18	1_norm	live	0.133476	-0.562352	-0.0305363	-0.254059	-0.00519942	1.68754	0.251485	0.0946783	0.218487	-0.0219584	0.0298989	-0.815622	-0.174148	-0.0884413	0.508995	0.554582	0.177839	-0.117116	-0.579553	0.177787	-0.109958	0.161853	-0.523441	-0.449816	0.491924	-0.630589	-0.0064688	0.584136	-0.663448
J1865	3_three	SW18N	3_SW	3_18	1_norm	live	0.592725	-2.23485	-0.295688	-0.247532	-0.380161	2.18254	-0.383364	-0.478201	0.268658	-0.179295	-0.918745	0.0370454	-0.100896	-0.181012	0.0280038	-0.114364	0.541127	-0.946826	-0.588938	-0.0981296	-0.365518	1.42181	0.506804	-0.293278	0.98469	-0.577409	-0.455672	-1.47579	-1.38119
J1867	3_three	SW18N	3_SW	3_18	1_norm	live	0.2789	-1.522	0.302962	0.383841	-0.424015	2.21895	0.298613	-0.319556	0.36623	0.358833	-0.0188855	-0.116984	0.44195	0.206252	0.843727	0.201053	-0.291516	-0.56847	-0.196316	-0.330762	0.649748	0.782998	0.20854	0.322544	0.983476	-0.49356	-0.109638	-1.10509	-0.250312
J1869	3_three	SW18N	3_SW	3_18	1_norm	live	0.66627	-1.03051	-0.484095	-0.172617	0.110652	1.62889	-0.0378533	-0.52081	0.592363	-0.382829	0.607328	-0.237189	-0.154612	-0.378101	-0.0109487	-0.743767	-0.541565	0.64038	-0.888194	-0.189468	0.224785	1.36631	0.38517	-0.631484	0.882857	-1.03758	-0.896548	0.671141	-0.619095
J1870	3_three	SW18H	3_SW	3_18	2_hypox	dead	1.58696	-2.03743	0.365218	0.262776	0.931848	3.02479	0.465301	-0.106125	1.52204	1.38845	1.20884	3.05988	1.03006	-0.107545	0.902619	-0.369292	1.02821	0.624666	0.0286995	1.16121	0.986972	2.75072	1.46025	-0.41456	2.01922	0.13326	-0.243402	0.40554	-0.17606
J1871	3_three	SW18H	3_SW	3_18	2_hypox	dead	1.08976	-1.01896	0.370045	0.725763	1.61073	2.62913	0.95095	1.07506	0.781777	1.27615	2.10107	2.43107	0.935719	0.417339	1.07607	0.974638	1.42323	0.719629	0.369104	0.896616	1.19334	1.74489	1.19338	0.731342	1.2358	0.443939	0.090451	0.674779	0.671868
J1872	3_three	SW18H	3_SW	3_18	2_hypox	moribund	1.28071	-12.7862	-0.0323974	0.224129	1.34995	2.33896	0.253416	0.748512	0.675224	1.10628	2.06869	1.47195	0.571606	-0.528233	0.322732	-0.344505	0.128323	0.413521	-0.269138	0.657132	0.112481	1.96625	1.1652	0.60596	0.635434	0.0179118	-0.289007	0.536151	0.554146
J1873	3_three	SW18H	3_SW	3_18	2_hypox	dead	1.38338	-0.861653	0.567056	0.662575	1.10907	3.21589	0.704034	0.587218	0.778002	1.43959	1.16095	1.93274	1.09796	0.294376	1.23966	1.14375	1.75558	0.0354071	0.378883	1.20877	1.401	1.51611	1.24921	0.755729	1.01304	0.344829	0.0479198	0.892633	0.548643
J1874	3_three	SW18H	3_SW	3_18	2_hypox	moribund	1.48848	0.996721	0.965695	1.55031	1.25375	2.28087	1.52426	1.09766	0.79675	1.79879	1.21405	1.16207	1.15584	1.02217	1.579	1.1928	1.59812	0.582309	0.623808	1.88709	0.29761	1.77433	1.21046	1.73597	1.2253	0.937995	0.901356	0.687355	1.10405
J1876	3_three	SW18H	3_SW	3_18	2_hypox	dead	0.625683	0.0961109	0.00815427	0.633215	0.208977	1.93506	0.826929	0.387055	1.67148	0.926423	0.278045	2.75709	0.596394	0.183443	0.655179	0.951654	1.5752	0.383477	0.574745	0.88264	0.0391717	1.72066	1.43321	0.589917	0.679078	0.095099	-0.124881	0.233713	-0.100963
J1879	3_three	SW18H	3_SW	3_18	2_hypox	live	-0.25471	0.223713	-0.500159	-0.367668	0.012331	-0.76916	-0.535496	-0.15201	0.699197	-0.0660719	-1.16927	0.0215277	-1.99992	-0.323519	0.101895	0.099087	-0.414633	-0.108351	-0.600623	-0.716222	-0.390682	0.22688	-0.507652	-0.0376727	-0.802466	-1.03487	-0.674322	-1.13167	-0.48023
J1880	3_three	SW18H	3_SW	3_18	2_hypox	live	0.449229	-0.436972	-0.24492	-0.188531	0.115634	2.1637	0.259351	-0.147949	0.573466	0.0169422	-0.0286223	0.528741	0.269833	-0.115821	0.401319	0.120863	0.836161	-0.362261	-0.171127	-0.442616	0.0431741	1.11959	0.472953	0.245707	1.49731	-0.428713	-0.322285	-0.179524	-0.554839
J1881	3_three	SW18H	3_SW	3_18	2_hypox	live	-0.0908336	-1.65809	-0.952694	-1.03984	-0.063409	1.74945	-0.798687	-1.8174	0.265533	-0.754643	-0.896706	0.246622	-0.231355	-1.39134	0.189019	-1.3656	0.253752	-1.42743	-1.50661	0.104862	-0.61991	0.90164	0.064365	-1.38586	0.865948	-1.63176	-1.04504	-0.359322	-1.58019
J1882	3_three	SW18H	3_SW	3_18	2_hypox	live	0.121274	-1.32157	-0.700663	-0.420834	-0.32733	1.81396	-0.638734	-1.0309	-0.0636318	-0.365876	-0.50495	0.103108	-0.0180326	-0.756225	-0.40863	-0.824805	0.568131	-1.13996	-1.03662	-0.234982	-1.13332	1.16078	-1.05172	-0.180542	1.49393	-0.848969	-0.89805	-1.55101	-1.64944
J1883	3_three	SW18H	3_SW	3_18	2_hypox	live	-0.0430978	-0.561277	-0.843306	-0.270689	0.887064	-0.889718	-0.789753	-0.470895	0.796089	-0.250094	-0.653221	-0.372373	-2.50158	-0.698831	-0.518567	-0.460252	-1.2177	0.0517742	-0.921864	-1.29488	-0.749414	0.367256	-0.288155	-0.0579848	-0.0785038	-1.50007	-0.933546	-0.627853	0.223154
J1884	3_three	SW18H	3_SW	3_18	2_hypox	live	0.27336	-0.206155	0.389077	-0.0136975	-0.180995	2.12915	0.648794	-0.132804	0.3405	0.564264	-0.794129	-0.189797	0.329412	0.0467005	0.532218	0.354964	0.0400281	-1.00031	-0.101317	0.0259939	0.39177	1.19101	-0.82906	0.526093	1.13708	-0.381873	0.108864	-1.07473	-0.53258
J1885	3_three	SW18H	3_SW	3_18	2_hypox	live	0.636372	-0.297231	0.526486	0.205829	0.0562065	1.87049	0.660405	-0.0502772	0.481783	0.552459	0.217684	0.665219	0.319799	0.263098	0.851126	0.490299	0.917172	-0.749025	-0.0269583	0.372617	0.808708	1.85391	0.94874	0.16464	1.06061	-0.477612	-0.190174	-0.3329	-0.58304
J1886	3_three	SW18H	3_SW	3_18	2_hypox	live	0.517092	-1.47989	0.149203	0.492366	-0.0620691	1.91415	0.976127	0.725728	0.775321	0.508179	0.691535	0.162799	0.0540678	0.0642947	0.572619	0.423118	0.500206	0.330813	-0.139179	0.964097	0.00532635	0.931857	0.44353	0.174138	1.23581	-0.596191	-0.286739	0.606766	-0.127827
J1887	3_three	SW18H	3_SW	3_18	2_hypox	live	0.626493	-0.0963166	0.553694	0.220003	0.167137	2.27414	0.723743	0.211756	0.656619	0.703055	0.491078	0.441641	0.474892	0.503309	1.18486	0.420469	1.04927	-0.632378	0.126515	0.911194	1.42564	1.17172	0.864628	0.357351	1.28164	-0.362561	-0.095672	-0.714421	-0.0160539
J1888	3_three	SW18H	3_SW	3_18	2_hypox	live	0.30515	-0.367685	-0.430985	-0.480437	0.231784	1.77753	0.34802	-0.28576	0.352758	-0.272021	0.502154	-0.138073	0.0410638	-0.2407	0.0133851	0.155721	-0.605513	-0.237315	-0.695761	-0.337545	0.459812	-0.0510495	-0.434864	-0.411884	0.939811	-0.79343	-0.525575	0.480074	-0.971499
J1889	3_three	SW18H	3_SW	3_18	2_hypox	live	0.632857	-0.669408	-0.0991338	-0.426169	0.315019	2.26927	0.00863564	-0.255881	0.893817	0.151885	-0.0543061	0.557207	0.329395	-0.0756426	0.342311	0.0696839	1.079	-0.625557	-0.402638	-0.771099	0.259304	1.22924	1.04755	-0.161608	1.3317	-0.518373	-0.548151	-0.308146	-1.21929
J1891	3_three	SW18H	3_SW	3_18	2_hypox	live	0.529012	-0.796334	-0.39458	-0.711658	0.817523	1.94914	0.0379593	-0.378536	0.682206	-0.221185	0.665213	0.362814	-0.00602209	0.0078992	-0.0674831	0.00733744	0.666936	-0.254403	-0.649551	-0.390589	0.292717	0.722722	0.133911	-0.724098	1.36376	-0.511281	-0.603029	0.488827	-1.62291
J1900	4_four	SW18N	3_SW	3_18	1_norm	dead	1.38721	1.60991	0.705048	0.949398	0.524273	1.03223	1.47447	1.84934	0.187132	2.04348	1.5087	3.11822	1.86014	1.02534	0.93882	1.8641	0.993292	0.837828	1.80891	0.717981	1.19128	1.07711	1.31789	0.423393	-0.566637	1.51209	0.658381	0.563701	2.76698
J1901	4_four	BW18N	2_BW	3_18	1_norm	moribund	1.01055	0.717519	0.150863	0.290029	0.310545	1.29403	0.570224	0.868611	0.513895	0.558224	2.12219	2.04257	1.12374	0.564075	0.139118	0.884331	0.320224	0.856359	1.07507	-0.0574665	0.186211	0.65553	0.584981	-0.246819	0.0712835	0.832373	-0.365302	1.02108	1.80672
J1902	4_four	SW18N	3_SW	3_18	1_norm	moribund	0.236331	0.859509	-0.285186	0.0662412	-0.834252	0.225521	0.51411	0.156438	-0.763202	0.577196	0.398571	1.61965	0.788624	0.0170923	-0.0753871	0.309886	0.0484226	0.279485	0.775289	-0.199497	-0.511616	-0.237697	0.308772	-0.452664	-2.7353	0.754287	-0.308966	0.186632	1.72529
J1904	4_four	SW14H	3_SW	2_14	2_hypox	dead	1.13285	1.45587	0.624894	1.13452	0.378346	1.03259	0.957071	0.964864	-0.0273759	1.28251	2.0548	2.79728	1.73462	0.801545	0.796939	1.19662	0.617499	1.06495	1.06845	0.464683	0.257867	0.638653	0.715052	-0.617908	-0.749807	1.03695	0.0399973	1.07068	1.58442
J1905	4_four	FW14N	1_FW	2_14	1_norm	moribund	1.17697	-1.38461	-0.982318	-0.670232	0.860759	1.64522	-0.102831	-0.174666	0.282211	-0.898704	1.91759	1.12114	0.926776	-0.687689	-0.0868902	-1.09863	-0.173922	1.54356	0.23028	-0.766418	-0.726625	0.519551	-0.122891	-2.60111	0.207756	0.396447	-0.798541	0.596838	1.03967
J1906	4_four	FW14H	1_FW	2_14	2_hypox	moribund	1.01072	-0.265518	-1.13597	-0.985314	0.756762	1.85245	-0.93321	-0.0958735	0.500385	-1.00006	2.09097	1.51416	0.691333	-0.866479	1.12668	-1.35668	-0.0925767	1.75271	-0.317616	-1.42117	-1.96625	0.77219	-0.453168	-2.34779	0.879013	0.0201151	-1.01997	0.424425	0.478148
J1907	4_four	FW14H	1_FW	2_14	2_hypox	moribund	1.37744	-0.66037	-0.334225	-0.130571	0.90466	2.21653	0.0338585	0.772012	0.954301	-0.359794	2.34714	1.78117	1.15068	-0.0746891	0.730836	-0.295258	-0.665906	1.83767	0.433003	-0.422201	-0.0364635	0.928004	0.18629	-1.31743	1.00782	0.713976	-0.134839	0.925409	1.30715
J1908	4_four	SW18H	3_SW	3_18	2_hypox	dead	1.14172	0.292885	-0.788313	-0.578278	-0.302165	0.915616	0.0282251	0.4529	0.60723	1.30515	2.20465	3.00782	0.891087	-0.741836	-0.588502	-0.0628582	0.407578	1.45696	0.54482	-0.442598	-0.290384	1.25604	0.782704	-1.01947	-0.582183	0.341649	-1.29925	1.19962	0.754608
J1909	4_four	SW10N	3_SW	1_10	1_norm	dead	0.498414	0.311843	-0.597755	-0.118462	0.130009	0.705931	-0.308944	0.357047	0.617398	0.300698	2.30276	2.8988	1.18699	-0.212871	-0.788566	-0.253708	0.706775	1.28845	0.546559	-0.0825762	-0.56138	0.175776	0.707192	-0.865569	-1.86638	0.672733	-1.00649	1.03347	1.02028
J1911	4_four	FW14N	1_FW	2_14	1_norm	moribund	0.537425	-1.70645	-0.897211	-0.651273	0.103862	1.25118	-1.05736	-1.0934	-0.453074	-1.2785	1.71606	1.01556	0.50684	-1.09899	0.0677539	-1.43946	-0.409165	0.618563	-0.787731	-1.31481	-1.23695	0.232491	-0.383839	-2.21468	0.0756742	-0.212437	-1.18118	0.0541531	0.241921
J1912	4_four	FW18N	1_FW	3_18	1_norm	moribund	0.664808	-1.16015	-1.1218	-0.611073	0.277183	1.32865	-0.549989	-0.461408	0.0799821	-0.950998	1.20717	0.501406	0.817934	-0.673822	-1.03218	-0.702625	-0.0953107	1.50851	0.11235	-0.783792	-0.75801	0.150519	-0.0640866	-1.94906	-0.504104	0.526773	-0.833952	0.282207	0.76951
J1913	4_four	FW10N	1_FW	1_10	1_norm	dead	0.948184	0.026391	-0.832004	-0.447221	0.53824	1.38425	-0.282449	0.0714435	-0.295493	-0.643447	1.77191	1.04461	1.17841	-0.209321	-0.906416	-0.735563	-0.332152	1.08747	0.543505	-0.140336	-0.563679	0.134637	0.213607	-1.37177	-0.473752	0.819898	-0.27563	0.299209	1.0172
J1914	4_four	FW14N	1_FW	2_14	1_norm	moribund	1.09436	-1.88723	-1.66241	-1.31641	0.713721	1.56287	-0.963152	-0.630706	0.0551787	-1.41628	1.87793	1.55137	0.984545	-1.31901	-0.822552	-1.56293	-0.468707	1.27194	0.0243177	-0.892895	-2.32753	0.308314	-0.506431	-3.11044	0.420325	0.253082	-1.28049	0.623274	0.181633
J1915	4_four	BW18H	2_BW	3_18	2_hypox	dead	0.846442	-0.624126	-1.46272	-1.20075	0.0861067	1.34657	-0.572686	-0.013734	0.875038	-0.724677	2.03414	3.06685	1.19701	-1.44707	-1.04276	-1.31535	-0.506359	1.27198	-0.551549	-0.497982	-1.08632	0.79188	0.659219	-3.05166	0.0994874	-0.0863611	-1.52808	1.4022	0.302287
J1916	4_four	BW14H	2_BW	2_14	2_hypox	moribund	2.04774	-0.275176	-0.0360541	0.130484	0.946085	2.07791	0.103241	0.798327	1.50631	0.390677	2.45415	2.63654	1.58809	0.0189604	0.140124	0.278059	0.76297	1.61866	0.437989	0.344369	-0.220904	1.8821	0.719704	-1.34411	-0.460636	0.871613	-0.502665	1.36001	1.47108
J1917	4_four	SW14H	3_SW	2_14	2_hypox	moribund	1.83162	-0.592694	-0.21588	-0.292818	0.872176	1.79417	0.138905	1.26356	0.428563	0.789496	2.64229	3.0463	1.45511	-0.00486484	-0.479416	0.0544099	0.672114	1.67292	0.778644	-0.434467	-3.69297	1.78309	0.796167	-0.57759	0.0945147	1.07508	-0.7657	1.27234	1.87472
J1921	4_four	SW14N	3_SW	2_14	1_norm	dead	1.17672	-0.0462375	-0.893047	-0.613995	0.0553926	1.09268	-0.479431	0.121745	0.0392529	-0.114373	1.8232	2.17987	1.22423	-0.53521	-0.879013	-0.623653	0.493238	1.11278	-0.225039	-0.123579	-1.83991	0.999704	0.798227	-2.03524	-0.98216	0.604972	-0.748494	0.81974	0.566439
J1922	4_four	BW18H	2_BW	3_18	2_hypox	moribund	1.25567	-0.435247	-1.00106	-1.036	0.215282	1.49536	-1.04059	-0.179328	0.663732	-0.465059	2.56318	2.98911	1.28553	-0.87621	-1.2905	-0.956429	0.479552	1.05627	-0.563143	-1.13328	-1.73961	1.00142	0.62352	-2.59236	-0.167377	0.470734	-1.3875	1.58711	-0.250149
J1923	4_four	SW14N	3_SW	2_14	1_norm	dead	0.815339	-0.0828923	-1.14657	-0.466273	-0.249213	0.441961	-0.422952	-0.246021	-0.46209	-0.141116	1.55196	2.78019	1.20257	-0.59575	-1.02736	-0.40189	0.40447	0.401343	0.100699	-0.592734	-2.08707	0.102144	0.500037	-2.12361	-1.94838	0.830469	-0.916302	0.859546	0.479297
J1924	4_four	SW10H	3_SW	1_10	2_hypox	dead	1.04286	0.569398	0.0150297	0.37132	0.414878	0.494639	0.213355	0.514775	0.624604	0.278892	2.55403	2.76369	1.42239	-0.225852	-0.365957	0.75899	0.309752	1.71932	0.632993	-0.173992	-0.587945	0.960262	0.566032	-1.78537	-1.52033	0.417376	-0.697131	1.40791	1.69778
J1927	4_four	BW18H	2_BW	3_18	2_hypox	moribund	1.22951	-0.287494	-0.649479	-0.545746	0.342872	1.64568	-0.457699	0.385354	0.478738	-0.126839	2.37115	3.33308	1.5699	-0.862031	-0.98972	-0.201055	0.5508	1.28886	-0.0899689	-0.042638	-0.53975	1.04571	0.535659	-2.68258	-0.363449	0.161413	-1.06922	1.10326	0.543274
J1928	4_four	SW14N	3_SW	2_14	1_norm	moribund	1.12381	-0.455093	-0.886717	-0.972803	-0.119185	0.335919	-0.976838	0.512856	-0.315768	0.484361	1.49343	2.03769	0.987532	-1.2891	-1.10739	-0.312783	0.523381	0.0229798	0.108977	-0.411343	-0.681151	0.547565	1.08096	-1.77583	-1.60524	0.727007	-0.579815	0.178298	1.26339
J1930	4_four	FW14N	1_FW	2_14	1_norm	live	0.567865	0.297107	-0.158459	0.00170401	1.56096	-0.213318	0.127929	-0.0708566	-0.308758	-0.385348	0.0250684	1.77419	1.10228	0.0281971	-0.521116	-0.784588	-0.00107151	1.6445	0.427573	1.60892	0.228881	1.50707	0.0334117	0.575952	0.970169	0.623809	-0.464683	1.05379	0.0445152
J1942	4_four	FW14N	1_FW	2_14	1_norm	live	0.466302	2.16941	0.901592	1.04926	1.7115	0.346562	1.40554	2.14666	0.247292	0.834165	0.778177	2.06849	1.64932	1.64075	0.682575	0.546724	0.71567	1.60984	1.95225	3.00279	1.76694	1.48225	1.78508	2.37511	1.09643	2.21495	0.826941	0.959076	0.895279
J1947	4_four	FW14N	1_FW	2_14	1_norm	live	-1.17755	-1.90687	-0.42405	-1.93012	-1.90308	-1.80033	-0.440028	-0.24743	-2.36408	-0.928845	-2.4097	-1.65706	-1.40172	-0.625211	-1.45988	0.508963	-0.257726	-1.08738	-0.340559	-1.94753	0.927655	-1.43648	-1.72233	-1.0282	-1.57264	-1.24188	-1.21028	-1.91347	-1.76343
J1951	4_four	FW14H	1_FW	2_14	2_hypox	live	0.637558	1.23747	0.624775	0.392279	1.98788	0.922498	1.20785	1.11103	0.224388	0.416144	0.284892	1.84705	1.59025	1.08856	0.346287	-0.462919	0.4462	2.04971	0.843988	1.03811	0.82059	1.83855	-0.42596	1.07804	1.55415	1.15463	0.080966	1.34135	0.2151
J1957	4_four	FW14H	1_FW	2_14	2_hypox	live	-0.704281	-6.91571	-1.20513	-3.01717	-1.00752	-1.66382	-1.32765	-1.03503	-1.57139	-1.85841	-1.67322	-1.32744	-1.50793	-0.987894	-2.48136	-0.272695	-0.412334	-1.05113	-1.3473	-1.59369	-0.71513	-0.684312	-1.74218	-2.15035	-1.81056	-1.85102	-2.20609	-1.08236	-4.06902
J1966	4_four	FW14H	1_FW	2_14	2_hypox	live	0.528829	1.83365	0.672134	0.478366	1.82914	0.400043	1.13965	1.84037	0.416624	0.544105	0.993257	2.29036	1.45685	1.42742	0.158943	0.395086	0.468456	1.92601	1.53783	2.32766	1.6317	1.97591	1.48194	2.15245	1.26929	2.00099	0.673287	1.39729	0.427456
J1974	4_four	BW10H	2_BW	1_10	2_hypox	live	0.530478	0.559138	-0.426903	-0.46099	1.02609	-0.357592	0.458379	0.810807	-0.702209	-0.297941	0.989982	1.11247	1.026	0.336128	-0.799374	-1.4056	0.010756	1.71403	0.93921	1.49021	0.250607	1.59009	1.08915	1.29903	0.892591	1.01969	-0.399629	0.574199	0.558664
J1984	4_four	BW10H	2_BW	1_10	2_hypox	live	0.2416	0.945034	0.202625	-0.174974	1.16984	-0.184822	0.420504	1.06818	-0.335332	-0.431529	0.468778	1.36015	1.13141	0.252648	-0.514307	-0.236082	-0.0412896	1.32769	0.760159	0.371897	-0.538412	1.14536	-0.120857	0.809135	1.02787	1.18584	0.32795	0.697358	0.383305
J1990	4_four	BW10H	2_BW	1_10	2_hypox	live	-1.53954	-0.938415	-1.06591	-2.66906	-1.67459	-1.44114	-1.10063	-1.12858	-2.50772	-1.65569	-1.44772	-2.56869	-1.75837	-1.13733	-1.99046	-0.462082	-0.505924	-0.69368	-0.874818	-1.71913	-0.529621	-0.999895	-2.24686	-1.04447	-0.768687	-1.73384	-1.72473	-1.81489	-2.10854
J2000	4_four	BW10N	2_BW	1_10	1_norm	live	0.0453848	-5.82994	0.339301	0.509233	1.08311	-0.248625	0.480402	0.933398	-0.532868	-0.00979812	0.77229	1.43648	1.15221	0.513859	0.244205	-0.0771937	0.11486	1.20453	0.976862	1.41924	0.447536	1.0735	0.995926	1.28038	0.546475	1.1905	0.393873	0.397229	0.856035
J2001	4_four	BW10N	2_BW	1_10	1_norm	live	-0.911333	-1.49921	-0.595568	-2.13517	-1.90322	-1.45256	-0.358749	-0.586712	-1.95266	-1.32361	-1.52167	-0.958255	-1.15548	-0.666588	-1.46164	0.192907	-1.3423	-0.555228	-0.518616	-1.05012	0.6808	-1.02551	-1.528	-0.569798	-0.980294	-1.33001	-1.33715	-0.775686	-1.99166
J2015	4_four	BW10N	2_BW	1_10	1_norm	live	0.122532	-1.17705	0.706665	0.721206	0.761074	-0.391765	0.96976	1.27597	-0.704382	0.195998	0.0275659	1.32313	1.12146	0.60985	0.170961	-0.0239273	0.345294	1.10263	1.27418	2.45518	1.01065	1.04848	0.907998	1.46698	0.144541	1.37143	0.819093	0.285438	1.39543
J2023	4_four	BW14H	2_BW	2_14	2_hypox	live	0.635376	0.874019	0.123841	0.0588594	0.0329831	-0.114306	0.715099	0.793586	-0.422715	0.0969937	0.605171	1.08358	0.855567	0.139139	-0.609053	-0.359926	0.307923	1.31761	1.04587	1.45462	0.484173	1.34685	0.7879	0.917201	1.55522	1.00129	0.200367	0.933331	0.549423
J2029	4_four	BW14H	2_BW	2_14	2_hypox	live	0.587398	0.255083	0.580774	0.47494	1.66264	0.693221	1.22747	1.08265	0.225075	0.121928	1.391	2.59553	1.6493	0.988778	0.556389	0.630704	0.684919	1.85266	1.4017	2.40926	1.304	1.99083	1.33369	1.39775	1.62541	1.66408	0.489521	1.26758	-0.194779
J2040	4_four	BW14H	2_BW	2_14	2_hypox	live	-1.1317	-1.35149	-1.05164	-2.87683	-1.81723	-1.43529	-1.04878	-1.42028	-2.26915	-1.31201	-1.30738	-0.811933	-1.48195	-1.35022	-1.76924	-0.124395	0.0567489	-1.12	-0.931901	-1.59722	0.135796	-1.29399	-1.43835	-1.69657	-0.911776	-1.85337	-1.8971	-0.813774	-2.821
J2041	4_four	SW18N	3_SW	3_18	1_norm	moribund	0.684071	0.713376	-0.33837	-0.00446583	-0.297444	0.463848	0.0178404	-0.391411	-0.358435	0.54555	0.899578	2.2292	1.29199	-0.125113	0.0448084	-0.0937448	0.600958	0.119499	0.433483	-0.356419	-1.70165	0.0534479	0.630798	-1.71848	-1.31759	0.696725	-0.515421	0.130903	0.820695
J2043	4_four	BW14N	2_BW	2_14	1_norm	live	0.113391	2.36376	1.00391	1.19875	1.24512	0.0138651	1.67388	2.07962	-0.460799	1.14043	0.0304877	1.67929	1.86818	1.69867	0.712636	1.10406	0.756482	0.811841	2.07417	2.60709	1.94828	0.973049	1.89676	2.30981	0.587204	2.24555	1.38252	0.717407	1.24875
J2044	4_four	SW18N	3_SW	3_18	1_norm	dead	1.33706	1.02917	-0.0915301	0.675075	0.273285	0.668033	0.834395	1.13935	0.108956	1.27333	2.0797	3.29379	1.56809	0.425176	0.102072	0.581298	0.661354	0.909204	1.43884	0.133404	0.348776	0.655344	1.35846	-0.548726	-0.293412	0.893195	-0.143485	1.25914	1.94976
J2054	4_four	BW14N	2_BW	2_14	1_norm	live	-0.518476	-0.934718	-0.617443	-2.41199	-1.22039	-0.641699	-0.781544	-0.896709	-1.8233	-0.976195	-0.142698	-0.879982	-0.99322	-0.665373	-1.58975	-0.0906878	0.203754	-0.700058	-0.804447	-2.08487	0.708159	-1.27017	-1.33523	-1.60672	-0.447203	-1.52317	-1.70168	-0.947961	-2.35614
J2055	4_four	BW14N	2_BW	2_14	1_norm	live	0.202198	-0.255901	0.998527	0.942315	1.21851	-0.0196495	1.05582	1.37652	-0.0900991	0.416224	0.408098	1.95625	1.34795	0.792973	0.639038	0.859695	0.708882	1.13305	1.63222	2.89972	1.38464	1.56126	1.18967	1.34744	0.0639851	1.53414	1.16429	0.54151	1.43025
J2068	4_four	BW18H	2_BW	3_18	2_hypox	live	0.327107	0.616063	0.119322	0.31709	1.10436	-0.24801	0.747965	0.733265	-0.419981	0.241043	-0.316671	1.42031	0.999629	0.5379	-0.688228	-0.397367	0.208074	0.692661	1.00486	1.81536	-0.272099	1.41664	1.35605	0.88896	1.01779	1.16268	0.356429	0.312573	0.661366
J2081	4_four	BW18H	2_BW	3_18	2_hypox	live	0.344952	1.23082	0.336607	0.523427	1.1808	0.283781	0.656897	1.06939	0.245788	0.284941	0.0202623	1.34299	1.186	0.618868	-0.136441	0.149702	0.806447	1.0772	1.0159	2.15916	1.06757	1.38414	1.21057	0.267755	1.22712	1.2316	0.392057	0.643851	0.619667
J2082	4_four	BW18H	2_BW	3_18	2_hypox	live	-1.35173	-4.69619	-0.420719	-1.88208	-2.16115	-1.34917	-0.260303	-0.376315	-2.12373	-0.522863	-1.79585	-1.19358	-1.3475	-0.178171	-1.23928	0.938377	-0.0912713	-1.35891	-0.12776	-1.67067	1.09043	-1.40194	-0.9525	-0.928187	-0.99487	-1.21158	-1.11161	-1.75855	-1.95763
J2090	4_four	BW18N	2_BW	3_18	1_norm	live	0.374344	0.939915	0.197853	-0.355952	1.32674	0.498371	0.478009	0.842015	0.0753722	0.408777	-1.2121	1.82967	1.51983	0.785086	0.141914	0.572696	0.684273	0.288817	0.925074	0.668885	1.18052	1.31826	1.39205	0.886325	0.16519	1.38816	0.723401	0.229043	-0.572603
J2094	4_four	BW18N	2_BW	3_18	1_norm	live	-0.817566	-1.05378	-1.01732	-2.73432	-1.12059	-0.853289	-1.06802	-1.04963	-2.18117	-1.13471	-0.226351	-0.520645	-1.19895	-1.12509	-1.61534	-0.404387	0.158205	-1.3162	-1.02915	-0.940577	0.617731	-1.06131	-2.21759	-1.90014	-1.01875	-1.7091	-1.95588	-0.898489	-2.46693
J2102	4_four	BW18N	2_BW	3_18	1_norm	live	0.531944	0.854196	-0.0808811	-0.367339	1.57702	0.730764	0.428544	0.654086	0.118174	-0.0982695	1.29028	1.92264	1.27959	0.138994	-0.438636	0.30882	0.68708	0.752166	0.727299	1.21746	0.726222	1.53099	0.945496	0.717012	1.23125	1.17604	0.142184	0.865599	-0.352114
J2120	4_four	SW14H	3_SW	2_14	2_hypox	live	0.12861	-4.27224	0.512431	0.800776	0.815274	0.236265	0.499924	1.12485	-0.158807	0.228529	-0.0170875	1.62517	1.09025	0.273042	0.126188	0.206482	-0.646798	1.06951	1.0747	1.79348	0.141451	1.17886	0.703393	1.0897	0.580724	1.19906	0.77663	0.512513	0.898077
J2129	4_four	SW14H	3_SW	2_14	2_hypox	live	-0.7559	-1.58764	-0.309631	-1.95197	-1.74447	-1.03921	-0.394129	-0.19168	-1.97159	-0.656468	-1.98498	-1.45428	-1.20334	-0.209315	-1.11013	0.694896	0.0455866	-1.36351	-0.272714	-0.996713	1.17916	-1.17324	-1.09143	-0.565302	-0.838669	-1.13059	-0.9445	-1.34236	-2.05877
J2130	4_four	SW14H	3_SW	2_14	2_hypox	live	-0.0650924	1.41811	0.413197	0.149694	0.773373	0.246945	0.689276	0.866675	-0.187278	0.219798	0.306308	1.43772	1.10514	0.680737	-0.0393535	0.600691	0.210121	1.05123	1.08024	1.75721	1.18786	0.908298	0.901397	1.38604	0.937196	1.38951	0.579529	0.866644	0.181386
J2136	4_four	SW14N	3_SW	2_14	1_norm	live	0.679247	-0.222511	0.677388	0.412444	1.89502	0.753633	0.714867	0.894788	0.219748	0.265137	1.56106	1.8498	1.40488	0.275204	0.630456	0.18979	1.10448	1.34113	0.623478	1.0924	-0.151188	1.59261	0.43011	0.750842	1.29644	0.989312	0.0180703	0.868539	0.189811
J2138	4_four	SW14N	3_SW	2_14	1_norm	live	-0.575787	-0.861348	-0.415106	-1.93126	-1.59489	-1.55455	-0.656923	-0.486187	-2.25315	-0.775839	-0.744688	-1.07319	-1.14736	-0.542952	-1.45083	0.0417899	0.0781737	-0.897378	-0.366034	-0.327256	0.755162	-0.408245	-0.916885	-1.00059	-1.10727	-1.43998	-1.4054	-0.979868	-1.70795
J2150	4_four	SW14N	3_SW	2_14	1_norm	live	0.104265	0.874305	1.29357	1.39063	-0.626377	-0.859369	1.80779	1.93934	-1.05384	1.22011	-0.293083	1.081	1.62303	1.29694	0.637117	1.02823	0.57652	0.640818	2.1684	2.26742	1.24099	1.31029	2.00971	1.63626	-0.222337	1.84063	1.34639	-0.0249019	1.85597
J2160	4_four	FW10N	1_FW	1_10	1_norm	live	0.567654	1.81009	0.67506	0.907377	1.62233	-0.0921371	1.56277	1.56302	0.238811	0.69264	0.257644	2.25122	1.56556	1.42724	0.312952	0.895449	0.906369	1.05672	1.99741	2.8293	1.7848	1.66678	0.976227	1.91816	0.0622077	2.1075	0.838735	0.697583	-0.457187
J2176	4_four	FW10N	1_FW	1_10	1_norm	live	0.00798333	0.421768	0.667177	0.313481	1.0774	-0.191289	1.05951	1.37088	-0.354735	0.334582	-0.259804	0.512209	0.960337	0.949922	0.340978	0.298406	0.494672	1.08376	1.25621	1.92319	1.14803	0.884144	1.17776	2.07256	0.661181	1.51945	0.815168	0.637427	1.08162
J2185	4_four	FW10H	1_FW	1_10	2_hypox	live	0.387753	0.340508	-0.15077	-0.191376	1.63861	-0.201179	-0.118295	0.361488	0.211382	-0.579587	0.851182	1.32379	0.828837	-0.0108926	-0.484974	-0.455537	0.245348	1.4607	0.602336	0.497278	0.49196	1.33651	0.974809	0.698359	1.81323	0.826719	0.0707557	0.785582	0.411447
J2196	4_four	FW10H	1_FW	1_10	2_hypox	live	0.119156	-0.617763	-0.218474	-0.430314	1.24263	0.0531055	-0.130452	0.510725	0.147172	-0.576198	0.299109	1.43193	0.935593	0.101333	-0.623648	-0.362999	-0.776154	1.54912	0.691163	1.43918	0.184989	1.39954	0.95218	0.802211	1.08095	1.07186	0.23751	1.07602	0.254147
J2202	4_four	FW18N	1_FW	3_18	1_norm	live	-0.362723	1.4931	0.478404	0.316488	0.901959	-0.151669	0.752097	0.77556	-0.62459	0.261214	-0.222041	0.806821	1.04425	0.892558	0.326491	-0.290769	0.361306	0.432068	1.02928	1.81391	-0.351655	0.398988	1.03155	0.549933	-0.827063	1.5505	0.651981	-0.237781	1.33403
J2216	4_four	FW18N	1_FW	3_18	1_norm	live	0.168704	1.13433	0.264347	0.224762	1.51665	0.715145	0.778533	0.882819	0.48296	0.333262	0.303705	1.66904	1.28543	0.624649	0.104228	0.824926	0.884649	1.4695	1.20696	1.71687	1.17318	1.54261	1.57484	0.611428	0.795115	1.49842	0.632086	0.713036	0.340783
J2235	4_four	FW18H	1_FW	3_18	2_hypox	live	-0.106007	1.05198	0.264442	0.0690771	1.25265	-0.279426	1.04492	0.949543	-0.370231	-0.127111	0.197786	0.748911	1.10157	0.579716	-0.532005	-1.04925	0.318359	0.874878	0.955751	1.69173	-0.783014	1.17062	0.0505094	0.949881	0.456743	1.03081	0.0599176	0.267411	0.823038
J2254	4_four	SW10H	3_SW	1_10	2_hypox	live	-0.0621722	-0.0398203	0.793643	0.843464	0.882571	-0.466601	0.807246	1.23844	-0.605841	0.294744	0.565394	1.70641	1.35488	0.734802	0.295871	-0.0613085	0.176649	1.29236	1.31311	2.79945	-0.728828	1.18598	1.09371	0.458912	-0.404862	1.00427	0.689758	0.231413	1.41747
J2260	4_four	SW10H	3_SW	1_10	2_hypox	live	-0.364718	1.92669	0.681997	0.711628	0.929088	-0.399277	1.07688	0.840116	-0.626096	0.274612	0.202405	1.53297	1.17792	0.820355	0.503091	1.07714	0.177191	0.790103	1.52846	2.48398	1.24359	0.625485	0.936155	1.82062	1.00581	1.62098	0.846419	0.428287	0.560631
J2266	4_four	SW10H	3_SW	1_10	2_hypox	live	-0.944908	-0.443987	-0.4453	-2.23974	-1.64165	-1.83047	-0.238342	-0.10241	-2.38614	-0.651791	-1.195	-0.911748	-1.14599	-0.42757	-1.54728	0.641808	0.245288	-0.561986	0.0700005	-0.00882716	1.24519	-0.347858	-0.911459	-0.00866673	-0.848795	-1.04129	-0.933379	-1.47613	-1.74196
J2275	4_four	SW10N	3_SW	1_10	1_norm	live	0.0146464	1.54059	0.598957	0.26117	0.899718	-0.214777	0.609611	-0.196269	-0.393104	0.342723	0.683739	1.66165	1.2284	0.416085	0.482796	-0.130805	0.520427	0.598059	0.798309	1.69893	0.0205473	0.792533	0.370526	1.1642	0.618072	1.26355	0.601324	0.886252	0.173268
J2284	4_four	SW10N	3_SW	1_10	1_norm	live	0.0794107	2.27121	1.03889	1.16451	0.95243	0.131614	1.55086	0.867088	-0.227101	0.726277	-0.0449016	1.53137	1.86905	1.41659	0.672683	-0.00693609	0.817735	0.590508	1.44502	2.19822	1.29016	0.753899	1.09236	2.08703	0.814507	1.86895	1.02387	0.540703	1.0455
J2287	4_four	SW10N	3_SW	1_10	1_norm	live	-1.08297	-1.42441	-0.684086	-2.10923	-0.979432	-3.28761	-0.697593	-0.65606	-2.10509	-1.29971	-0.073201	-0.888703	-0.797619	-0.373171	-1.81462	-0.221526	-0.0758954	-0.447923	-0.160664	-0.683735	0.314272	-1.06144	-0.552646	-0.456072	-2.2352	-1.026	-1.07139	-0.41644	-1.6081
J2291	4_four	SW18H	3_SW	3_18	2_hypox	live	-0.242904	0.0653624	0.379103	0.332431	1.37883	-0.056461	0.698825	0.666951	-0.0456234	0.135529	-0.558327	1.8032	1.46671	0.342437	0.125402	-0.0532585	0.733369	0.850401	0.657849	0.198116	0.364671	0.778806	0.792036	0.629971	0.734036	1.51983	0.75383	0.605222	-0.076248
J2298	4_four	SW18H	3_SW	3_18	2_hypox	live	0.611424	1.08026	0.324257	0.499544	1.20557	0.20493	0.946323	1.03339	-0.29505	0.539063	0.525318	1.93705	1.19912	0.63728	-0.213129	-0.510067	0.671289	1.44938	0.986398	1.93331	1.02417	1.67127	1.12275	1.08279	0.764567	1.14236	-0.0457214	0.655302	1.03797
J2300	4_four	SW18H	3_SW	3_18	2_hypox	live	-0.61222	-0.758415	-0.18804	-1.82481	-1.42914	-2.34636	-0.531629	-1.17716	-1.44054	-0.596758	-2.33804	-1.46367	-0.954058	-0.118732	-0.897021	0.376645	0.179482	-2.65435	-0.801143	-1.4344	0.451195	-0.943369	-1.20002	-1.77309	-3.25716	-1.3166	-1.10153	-1.41972	-3.47576
J2812	4_four	SW18N	3_SW	3_18	1_norm	live	-1.1293	-2.18217	-1.0608	-2.34647	-1.40107	-1.83084	-1.22194	-1.02631	-1.82108	-1.41914	-1.98216	-1.31925	-1.12396	-0.986347	-1.53949	-0.885329	-0.348163	-1.4952	-1.55185	-2.07119	0.176274	-1.63447	-2.32838	-1.75497	-2.16556	-1.75976	-1.38604	-0.95812	-3.25486
J2816	4_four	SW18N	3_SW	3_18	1_norm	live	0.150054	2.30063	1.34145	1.32549	1.13482	-0.0182587	1.91655	2.14436	-0.565892	1.07234	-0.23887	2.44567	1.72294	1.66531	0.749987	1.81202	0.469396	1.04208	1.99859	2.53993	1.05369	0.706537	1.39125	2.28521	0.331118	2.11799	1.28325	0.676126	1.37605
J2822	4_four	SW18N	3_SW	3_18	1_norm	live	0.355301	-0.0827219	0.0736659	0.0981481	1.06274	-0.0982208	0.610369	0.916828	-0.136103	0.103261	0.543504	1.30086	1.05703	0.318778	-0.472298	-0.848506	-0.663259	1.5877	0.715708	1.78635	0.682994	1.3326	0.354072	1.11167	0.993092	0.707632	-0.043858	0.908607	0.329862
L152	1_one	SW14N	3_SW	2_14	1_norm	moribund	1.65158	1.50333	0.586867	0.856566	0.346908	1.61092	1.20738	1.21934	1.04376	1.37111	2.56304	2.60746	1.66902	0.915553	0.817645	0.733887	1.10767	1.1982	1.38914	0.588732	1.21593	0.890509	0.741133	-0.109403	-0.203406	1.2491	-0.0994783	1.12115	2.23025
L154	1_one	SW14H	3_SW	2_14	2_hypox	moribund	1.59343	1.02927	0.671077	0.71919	0.388593	1.75413	0.971795	0.93989	0.973301	1.1463	2.57175	2.12835	1.78309	0.3761	0.839139	1.25372	0.911378	0.908156	0.960954	1.03047	0.833512	0.932943	0.665448	-0.262682	-0.350683	0.752656	-0.126355	0.91212	1.94947
L155	1_one	SW14N	3_SW	2_14	1_norm	moribund	1.23623	1.27414	0.711277	1.04954	0.0574395	1.29114	1.19514	1.3451	0.491888	1.74486	2.57341	2.17189	1.64071	0.602873	0.68865	1.77746	-0.0563509	0.854438	1.23459	0.829853	0.629412	1.08303	0.809446	0.22866	0.000298774	0.724254	-0.126145	0.886133	2.41189
L159	1_one	SW18H	3_SW	3_18	2_hypox	dead	1.405	1.56695	0.901459	1.05852	-0.80074	1.7438	1.14088	1.26822	0.47046	1.63018	2.72476	2.8596	2.02544	0.613169	1.12349	1.83826	1.00183	0.845327	1.68012	1.22385	1.08032	1.27029	1.15594	0.361813	-0.470641	1.37679	0.0806772	1.0387	2.45394
L160	1_one	SW18H	3_SW	3_18	2_hypox	moribund	1.54143	0.607094	0.805967	0.802127	0.312183	1.63764	1.17355	1.09312	0.803628	1.67493	2.81625	2.6746	1.95511	0.650996	0.797665	1.99426	1.0111	0.710351	1.51923	1.60179	0.136957	0.820885	1.00346	0.19558	-0.415853	1.14102	-0.073581	0.93862	2.19811
L161	1_one	SW18H	3_SW	3_18	2_hypox	moribund	1.79098	1.66628	0.972372	1.22067	0.653245	1.54911	1.47412	1.58561	0.289172	2.01703	2.78942	2.64579	2.14266	0.825149	1.09382	1.86964	1.22144	1.04284	1.63408	1.5098	0.139852	1.22277	1.3075	-0.00887674	-1.5224	1.46716	0.281385	0.950768	2.74076
L183	1_one	SW18N	3_SW	3_18	1_norm	moribund	1.52685	-0.115785	0.0403079	0.401386	0.289629	1.38848	0.467255	0.984944	0.890418	1.19057	2.08007	2.80755	1.69271	-0.203392	0.290026	1.15293	1.02713	1.03975	0.772054	0.211853	0.242071	1.12398	1.04328	-0.296698	0.368483	0.86146	0.140455	0.836967	1.92507
L184	1_one	SW18N	3_SW	3_18	1_norm	moribund	1.96614	-4.08718	0.220131	0.431478	0.4105	2.4976	0.310197	0.356436	1.17246	1.02507	2.78265	2.21649	2.01975	0.0557521	0.651788	0.0583242	1.10311	1.4839	0.0905921	0.537968	-0.302092	0.731382	0.611639	-1.18079	0.474517	0.907897	-0.116105	1.60618	1.01501
L185	1_one	SW10N	3_SW	1_10	1_norm	moribund	1.4223	0.234677	0.51563	0.705165	0.208825	1.09396	0.85278	0.840569	0.565864	1.3351	2.42582	2.55612	1.62874	0.277222	0.402999	1.22836	0.980852	0.860667	1.02337	0.163372	0.714838	0.88419	0.914681	-0.712718	-0.842249	0.858143	-0.467377	1.03444	2.06201
L186	1_one	SW18H	3_SW	3_18	2_hypox	moribund	1.33639	0.779865	0.159358	0.746694	0.448055	1.2703	0.250239	0.407091	0.503884	1.38427	2.11366	3.11293	1.72524	-0.049339	-0.1261	0.285542	0.0294488	0.887644	0.774548	0.609679	-1.8425	0.976089	0.920195	-1.35066	-0.361535	0.846836	0.341006	0.794438	2.00938
L187	1_one	SW10H	3_SW	1_10	2_hypox	moribund	1.49024	1.31104	0.69352	1.04311	-0.0335999	1.77865	0.738299	0.590059	0.749892	0.87367	2.414	2.36295	1.59253	0.64633	0.813185	1.10136	0.670358	1.39815	1.19432	0.381326	0.630707	1.1247	0.178438	-1.19209	-0.546784	0.684698	-0.228886	1.12049	2.21884
L188	1_one	SW18H	3_SW	3_18	2_hypox	moribund	1.59461	-0.126758	-0.266809	-0.102224	-0.0230794	1.81317	0.331416	0.734055	1.15537	0.702275	2.01442	2.46867	1.43671	-0.222407	-0.14258	0.760755	0.723328	1.79774	1.09315	0.122278	0.489966	1.26143	0.73411	-0.154985	0.711047	1.07633	0.233776	1.06948	1.98047
L189	1_one	SW18H	3_SW	3_18	2_hypox	live	-1.33497	-1.52067	-2.03358	-3.1052	-2.44059	-1.64413	-1.94145	-1.27238	-2.83045	-1.34159	-1.46239	-1.84832	-1.69471	-1.98295	-2.67151	-1.67709	-0.535183	-0.942866	-1.52507	-2.85575	-0.476759	-2.14666	-2.69239	-1.68192	-0.303247	-2.40522	-1.80166	-1.41733	-3.12876
L194	1_one	SW10N	3_SW	1_10	1_norm	moribund	1.71702	1.22951	0.699122	1.01986	0.491816	1.97988	0.760131	1.16749	0.963154	1.27657	2.68018	2.08776	1.99718	0.798829	1.06891	1.34817	1.04035	1.32687	1.16795	0.43822	1.04396	1.18947	1.3971	-0.382038	0.0385215	1.25239	-0.0178839	0.886461	2.33344
L195	1_one	SW10N	3_SW	1_10	1_norm	moribund	1.59679	1.11101	0.55822	0.822998	0.150114	1.38056	0.79156	0.643711	0.722993	1.37971	2.73553	2.40711	1.88212	0.561229	0.422036	0.903023	0.719032	1.34332	1.00193	0.59965	0.452542	1.48859	1.01712	-0.437952	0.197903	0.732799	-0.510247	0.931607	2.23206
L196	1_one	SW10H	3_SW	1_10	2_hypox	moribund	1.61379	-0.627699	-0.342384	0.532125	0.602085	1.71258	-0.58664	0.980644	-0.217712	0.380925	3.17241	2.05301	1.53095	-0.811532	-1.1599	0.187878	-0.39219	1.93363	-0.440758	-0.219142	-1.94649	1.30186	-0.0497452	-1.19984	0.352233	-0.377864	-1.15007	2.10954	-0.693335
L197	1_one	SW10H	3_SW	1_10	2_hypox	dead	2.02425	0.358177	-0.167632	-0.301432	0.515186	1.99245	-0.126663	0.545156	1.09103	0.198449	3.22442	2.7403	1.30816	-0.307415	0.0379637	0.297517	0.68268	1.3598	0.463317	0.355265	-0.321417	1.94992	0.727038	-0.914069	0.90988	0.333435	-1.20972	1.79246	0.618239
L207	1_one	FW14N	1_FW	2_14	1_norm	live	0.0169101	1.91128	0.687494	0.740876	0.501975	0.443738	1.44132	1.2298	0.0196061	0.737996	0.507886	0.985897	1.21791	1.18417	0.566274	0.356162	0.348174	1.40245	1.67511	1.98584	1.50323	0.629574	1.26441	1.99141	0.797516	1.50289	0.657714	0.79852	1.21662
L214	1_one	FW14H	1_FW	2_14	2_hypox	live	0.232019	1.73769	0.888103	1.10056	0.653047	0.613531	1.43578	1.55005	0.453811	0.640029	0.411251	1.54293	1.10691	1.14938	0.713402	0.617107	0.600893	1.42336	1.75131	2.18492	1.65676	1.21002	1.33554	1.61715	1.44039	1.51309	0.680494	1.38149	1.58334
L226	1_one	FW14N	1_FW	2_14	1_norm	live	0.299601	1.63085	0.704271	0.913642	0.347369	0.0674692	1.52556	1.40188	0.062166	0.869537	-0.207201	1.16537	1.16636	1.10655	0.775006	0.0704542	-4.86384	1.45523	1.72772	2.05534	1.69853	0.93285	1.44919	1.97803	1.06265	1.38356	0.653542	0.723561	1.21349
L227	1_one	FW14N	1_FW	2_14	1_norm	live	-1.48255	-2.52853	-1.6664	-2.33756	-2.0496	-3.17491	-1.61118	-1.73837	-2.53546	-1.71207	-0.421613	-2.5231	-1.31454	-1.46028	-3.51215	-3.02111	-1.18012	-0.245293	-1.79066	-1.80577	-1.90811	-1.94855	-2.02296	-1.79199	-2.56727	-2.90478	-2.18761	-0.295253	-3.69203
L238	1_one	FW14H	1_FW	2_14	2_hypox	live	-0.00992425	2.17779	1.15284	1.12693	-0.0377454	0.395343	1.86522	1.81519	0.112069	1.13608	0.0051062	0.702657	1.223	1.48541	0.957274	0.626153	0.717123	1.21324	2.1083	2.0997	2.11829	0.822613	1.12578	2.36454	1.04581	1.74661	1.2274	0.767336	1.42355
L250	1_one	BW10H	2_BW	1_10	2_hypox	live	-0.241427	1.22227	0.65852	0.237538	0.419442	0.00167926	0.721228	0.993807	-0.161213	0.385663	-0.0787379	0.750299	1.18526	0.573754	0.0808913	-0.0959431	0.455777	1.02221	1.15584	2.11013	0.82626	0.761289	1.24066	1.17465	0.952142	1.29729	0.848649	0.265434	0.845973
L251	1_one	BW10H	2_BW	1_10	2_hypox	live	-1.07286	-1.50597	-0.505121	-1.59046	-2.17602	-2.19191	-0.941206	-0.984642	-1.76846	-0.654476	-1.06907	-1.87395	-0.962978	-0.325277	-1.22967	-0.897388	-0.0391335	-0.868442	-0.304242	-1.11831	-0.348847	-1.39771	-0.678835	-0.647599	-1.01621	-1.13168	-0.625688	-0.292906	-1.54806
L262	1_one	BW10N	2_BW	1_10	1_norm	live	-0.266754	1.33429	0.631423	0.830913	0.0637897	-0.171148	1.17952	1.15701	-0.340726	0.565996	0.0393816	0.571105	1.04249	0.84902	0.496969	0.42125	0.413238	0.975736	1.55551	2.62828	1.11626	0.500303	1.3511	1.4365	0.436839	1.23232	0.977184	0.42803	1.6075
L263	1_one	BW10N	2_BW	1_10	1_norm	live	-1.59762	-0.358718	-0.750558	-1.69642	-2.60047	-2.99166	-0.819999	-1.30761	-1.61343	-0.992465	-0.880409	-2.26224	-1.18275	-0.63517	-1.32308	-0.896188	-0.679109	-0.946421	-0.488235	-1.01782	-0.331411	-1.85146	-1.068	-0.930547	-2.15112	-1.46284	-1.14444	-0.845156	-1.28587
L274	1_one	BW14H	2_BW	2_14	2_hypox	live	0.00852459	0.440323	0.546814	0.793317	-0.131067	-0.0658409	1.17557	1.29014	-0.0551188	0.781531	-0.46309	0.532205	1.01161	0.775869	0.393158	0.0390489	0.613537	1.13639	1.54943	2.05817	1.53097	1.1775	1.3394	1.87631	1.29887	1.43402	0.692541	0.426744	1.2781
L275	1_one	BW14H	2_BW	2_14	2_hypox	live	-1.13377	-0.166312	-0.619873	-1.89109	-2.3567	-2.54415	-0.13751	-0.943331	-1.76756	-0.360111	-1.84023	-1.69469	-1.37831	-0.213388	-1.36517	-0.0197994	0.101221	-1.66459	-0.424082	-1.82074	1.32298	-1.7856	-1.23782	-0.142884	-2.52054	-1.41729	-1.58935	-1.33163	-2.94255
L286	1_one	BW14N	2_BW	2_14	1_norm	live	0.224748	2.1558	1.44583	1.21748	0.193621	-0.0601677	1.85561	1.8138	-0.0545568	1.28449	-0.580317	0.378177	1.56527	1.55078	1.1003	1.22086	0.873957	0.550861	2.14752	1.78613	1.8526	0.48608	1.8404	1.97537	0.30972	1.85125	1.34991	0.259579	1.61576
L298	1_one	BW10H	2_BW	1_10	2_hypox	live	-0.182883	1.90933	0.842216	0.966116	0.274341	0.0656646	1.23916	1.4747	-0.167822	0.703897	-0.128406	0.763003	1.52822	1.24119	0.539883	1.19075	0.506497	0.685798	1.93729	1.5576	1.34862	0.752224	0.986299	1.82436	1.06957	1.81696	1.20783	0.527118	1.03991
L310	1_one	BW10N	2_BW	1_10	1_norm	live	0.292162	2.05005	1.12002	1.1132	0.517506	0.124367	1.59644	1.72513	0.146061	1.00908	-0.00744269	0.62537	1.21953	1.34651	0.924586	0.908241	0.757773	0.932945	1.97786	2.55685	1.85927	0.790125	1.19322	1.94844	1.30526	1.8076	1.15819	0.820493	1.50479
L322	1_one	BW14N	2_BW	2_14	1_norm	live	0.0170123	1.62044	0.712328	1.01222	0.591524	-0.25494	1.20787	1.24615	0.031007	0.691647	0.213163	0.955348	1.01773	0.748541	0.730526	0.0293642	0.382076	1.0443	1.49425	1.70648	1.25381	0.756337	1.10252	1.58093	0.623107	0.975987	0.7834	0.392253	1.24763
L323	1_one	BW14N	2_BW	2_14	1_norm	live	-0.916969	0.112133	0.0041369	-1.67039	-2.17743	-2.05449	0.114122	-0.0822861	-1.95434	0.0267919	-1.75149	-1.57296	-0.980087	-0.0690491	-1.02146	0.830299	0.338478	-1.25436	0.366383	0.130158	1.21071	-0.956209	-0.609805	-0.0231414	-1.33019	-1.09385	-0.855903	-1.4345	-1.70429
L334	1_one	BW18H	2_BW	3_18	2_hypox	live	-0.195519	1.52678	0.752358	1.03892	0.29543	0.136741	1.2596	0.733495	-0.103352	0.77186	-0.197877	0.943374	0.761513	0.571511	0.543414	0.982632	0.489255	0.450261	1.39778	2.54699	1.57969	0.597737	0.180971	1.18834	0.29646	0.970612	0.856632	0.15394	0.503088
L335	1_one	BW18H	2_BW	3_18	2_hypox	live	-1.33402	-0.638062	-0.731119	-2.41062	-2.41234	-1.22617	-0.446601	-0.967582	-2.03197	-0.724907	-1.54169	-1.54363	-1.52765	-0.801033	-1.33301	0.151777	0.00463917	-1.28842	-0.546043	-1.68672	0.972875	-1.08288	-1.80723	-1.27161	-0.876986	-1.69495	-1.56309	-1.89763	-2.35909
L346	1_one	BW18H	2_BW	3_18	2_hypox	live	0.027604	-0.281381	0.577902	0.535699	0.904956	0.146285	0.519933	0.351851	-0.0659011	0.0941891	0.0708755	1.29802	1.18648	0.576568	0.213798	0.170182	0.365458	0.403832	0.872517	1.71972	0.900296	1.13002	1.02202	0.617332	0.688118	0.687766	0.425508	-0.0740172	0.394333
L358	1_one	BW18N	2_BW	3_18	1_norm	live	-0.0735556	1.63672	0.806409	0.62521	0.445835	0.431154	1.18337	0.876219	-0.0794491	0.807225	-1.25846	0.387508	1.12193	0.833581	0.67423	1.13768	0.54133	0.391524	1.30534	1.66562	1.44957	0.813575	1.02189	1.093	0.319488	1.13346	0.72229	0.376446	0.16468
L370	1_one	BW18N	2_BW	3_18	1_norm	live	0.0691514	0.126543	0.112425	-0.0681802	0.109446	-0.0378178	0.942272	0.885721	0.0205472	0.25445	-0.296606	0.527332	0.824159	0.213666	0.0366292	0.232504	-0.669961	0.899272	0.924236	1.21926	0.883283	0.713262	0.690892	1.49217	1.05939	0.64772	0.117783	0.617906	0.476993
L371	1_one	BW18N	2_BW	3_18	1_norm	live	-1.72485	-1.11115	-1.30473	-2.42497	-2.72688	-2.44841	-1.50578	-2.70343	-1.93236	-1.12484	-1.92039	-2.24764	-1.70118	-1.6882	-1.6669	-2.06921	-0.80305	-1.66028	-1.77247	-1.93405	-1.65048	-2.11955	-2.69553	-1.72037	-2.06305	-2.37304	-1.71415	-1.27681	-2.64068
L383	1_one	SW14H	3_SW	2_14	2_hypox	live	-1.65783	-0.754631	-0.753256	-2.2006	-2.93389	-1.88486	-0.680595	-0.865719	-2.84445	-0.962847	-1.9268	-2.43901	-1.62438	-0.914711	-1.24711	0.333195	-0.21832	-1.50729	-0.551738	-0.522664	0.622749	-1.40763	-1.65941	-1.30321	-1.21288	-1.67635	-1.33413	-2.17299	-2.06937
L384	1_one	SW14H	3_SW	2_14	2_hypox	live	-0.496766	1.78829	0.961829	0.975973	-0.101984	0.0553333	1.46109	1.3397	-0.379761	0.734443	-0.33035	0.157264	1.4244	0.836166	0.824001	0.470034	-0.474941	0.722682	1.41773	0.91241	1.23749	0.483653	1.06911	1.61478	0.877844	1.33042	1.08367	-0.0757216	0.694525
L393	1_one	SW14H	3_SW	2_14	2_hypox	live	-0.113267	1.23581	1.0539	0.912848	0.279592	0.115599	1.44378	1.32011	-0.225526	0.990501	-0.341325	0.66785	1.29873	1.03628	0.869405	1.15786	0.484806	0.795967	1.7734	2.64506	1.644	0.923683	0.848819	1.80097	0.870111	1.6602	1.25143	0.318895	0.795456
L399	1_one	SW14N	3_SW	2_14	1_norm	live	0.316667	1.41954	0.828483	0.924464	0.498403	-0.224194	1.08038	1.04365	-0.379411	0.822302	-0.095282	0.27995	1.10411	0.620895	0.636338	0.695718	0.431951	0.931991	1.34463	1.69397	0.236254	0.955233	1.01907	1.70169	1.21416	1.13185	0.893072	0.451994	1.31348
L400	1_one	SW14N	3_SW	2_14	1_norm	live	-1.49403	-0.626293	-0.491594	-2.03358	-2.63152	-2.51727	-0.863919	-1.77054	-2.40561	-0.721606	-1.87506	-2.77829	-1.51141	-0.809193	-1.42395	-0.754703	-0.352802	-2.03241	-1.00931	-1.27378	0.156818	-2.10291	-1.77435	-0.981907	-1.92107	-1.78661	-1.3589	-1.56021	-2.40081
L411	1_one	SW14N	3_SW	2_14	1_norm	live	-0.0302628	1.86452	1.11787	0.96482	-0.100221	-0.21744	1.43313	1.22501	-0.551558	0.922051	-0.598074	0.164482	1.11725	0.826462	0.863738	1.20652	0.535672	0.454271	1.80181	2.61288	1.74922	0.838703	1.33877	1.76128	0.485826	1.30527	1.1942	0.103166	0.399306
L421	1_one	BW14H	2_BW	2_14	2_hypox	live	-0.315586	0.374548	0.938093	0.602809	-0.385741	-0.156201	1.23216	1.0297	-0.235709	0.824587	-0.913663	0.0398034	1.00485	0.560978	0.714835	1.17211	0.275637	0.883801	1.47201	1.56794	1.15076	0.428195	1.012	1.44658	0.641156	1.07393	1.00419	0.340552	1.16168
L433	1_one	FW10N	1_FW	1_10	1_norm	live	-0.395881	0.730423	0.244863	0.197312	0.334373	-0.228075	0.346474	0.658818	-0.242951	-0.331878	-0.284243	0.358609	0.473976	-0.417195	-0.307171	-0.362646	-0.404179	1.13153	0.559804	1.23012	0.355057	0.18188	0.42319	0.653456	0.221222	0.131851	0.286726	0.405836	0.269294
L434	1_one	FW10N	1_FW	1_10	1_norm	live	-1.70325	-1.43006	-1.43368	-3.00252	-3.0468	-1.56595	-1.01803	-1.19646	-2.41206	-1.65448	-1.77431	-2.45968	-2.48126	-1.19913	-2.00748	-0.683206	-0.678701	-1.00219	-0.751537	-1.92752	-0.47876	-2.46734	-1.78665	-1.21022	-0.985569	-2.15005	-1.72523	-1.65742	-2.01745
L445	1_one	FW10H	1_FW	1_10	2_hypox	live	-0.91049	-0.666707	-0.414234	-1.81942	-2.48454	-1.17547	-0.468194	-0.214601	-1.91681	-0.581002	-1.65789	-2.08745	-1.50983	-0.359804	-1.31353	0.358001	-1.02914	-0.801216	0.112052	0.327616	1.21404	-1.07705	-1.26651	-0.00646722	-0.182893	-1.18491	-0.78078	-1.41834	-1.27556
L446	1_one	FW10H	1_FW	1_10	2_hypox	live	0.0655155	0.668834	0.478993	0.485601	0.819474	0.0906569	0.469412	0.775959	0.236793	-0.0472443	1.1872	0.962269	1.06489	-0.0577333	0.0677448	0.181605	0.127969	1.30468	1.1345	2.10546	0.898878	0.66539	0.588754	1.02827	1.17688	0.539618	0.770668	1.21072	1.14093
L457	1_one	FW10N	1_FW	1_10	1_norm	live	-1.12513	-2.09287	-1.40453	-2.8654	-2.26408	-1.58428	-1.65373	-1.57898	-2.45975	-2.27951	-1.35961	-1.5173	-1.8496	-1.68266	-2.52872	-0.968425	-0.719572	-0.937044	-1.03925	-1.63435	-0.247345	-1.38386	-2.71523	-2.67898	-0.842674	-2.47175	-2.19897	-0.730146	-2.84792
L458	1_one	FW10N	1_FW	1_10	1_norm	live	-0.0481826	0.406923	0.52626	0.466375	0.729599	0.301122	0.78051	0.572732	0.00118374	0.264542	0.706897	0.796043	1.1955	0.538983	0.248304	0.116906	-0.0414358	1.32587	0.844512	1.77008	0.381739	0.0990958	0.720091	1.44215	1.12957	0.997188	0.703408	1.30329	0.982485
L469	1_one	FW10H	1_FW	1_10	2_hypox	live	-1.05829	-0.520946	-0.819894	-2.50971	-2.36676	-1.35906	-0.851752	-0.504316	-1.79006	-1.14645	-1.89771	-1.57258	-1.53111	-0.953583	-1.78184	0.0607849	-0.184292	-0.640596	-0.300449	-1.35573	0.981108	-1.05695	-1.35413	-1.11847	-0.519318	-1.57741	-1.50359	-0.906402	-2.18142
L470	1_one	FW10H	1_FW	1_10	2_hypox	live	-0.226682	1.42348	0.737643	0.427417	0.238611	0.238339	0.883166	0.907224	0.0666239	0.086631	0.477774	0.251507	1.11228	0.670946	0.311787	0.54246	0.352778	1.22544	1.43814	1.5737	0.991468	0.371798	1.11106	1.26532	1.10121	1.36259	1.07894	1.08325	1.28123
L481	1_one	FW18N	1_FW	3_18	1_norm	live	-1.45226	-1.25751	-1.46581	-3.17435	-2.6678	-1.09895	-1.11248	-1.96655	-1.89162	-1.40004	-2.06562	-2.11418	-2.06273	-1.36948	-1.91244	-1.02363	-0.480633	-0.757891	-1.4038	-2.18857	0.235034	-1.96135	-2.33564	-2.25744	-1.18778	-2.45648	-2.14614	-1.32844	-2.58567
L482	1_one	FW18N	1_FW	3_18	1_norm	live	-0.282028	0.500854	-0.239378	-0.36535	0.173878	-0.304685	0.517242	0.242484	-0.0758594	-0.218584	0.272143	0.431757	0.534885	-0.182155	-0.41755	-0.297686	-0.23515	1.27875	0.663098	1.06768	0.30262	0.657616	0.360373	0.510598	0.289088	0.0561551	-0.413331	0.935249	0.529142
L493	1_one	FW18N	1_FW	3_18	1_norm	live	-1.32634	-1.27051	-1.22079	-2.47383	-2.47217	-1.4183	-1.01444	-1.28127	-1.81626	-1.22496	-1.72813	-1.89808	-1.7715	-1.57277	-1.62027	-0.545657	-0.477838	-0.969169	-0.925493	-1.6788	0.423484	-1.66681	-1.69449	-1.49656	-1.32904	-2.26927	-1.91079	-1.58099	-2.71886
L494	1_one	FW18N	1_FW	3_18	1_norm	live	-0.459013	0.802545	-0.254856	-0.41682	0.320022	0.400452	0.248701	-0.235905	0.107424	-0.133788	0.249583	0.37999	0.700195	0.0818014	-0.171511	-0.923546	-0.0527765	0.594514	0.285193	1.77515	0.425195	-0.0808977	0.12919	0.973042	0.649302	0.661815	-0.18366	0.723288	-0.150197
L505	1_one	FW18H	1_FW	3_18	2_hypox	live	-1.75264	-2.54435	-2.21798	-4.00148	-2.71619	-1.38973	-2.0161	-2.46295	-2.2472	-2.47166	-1.93152	-2.36624	-2.41195	-2.56866	-3.08038	-1.36832	-2.1724	-1.04677	-2.10515	-3.64437	-0.00257121	-2.49635	-3.38327	-3.02999	-1.16978	-3.19027	-3.07038	-1.47042	-3.47195
L506	1_one	FW18H	1_FW	3_18	2_hypox	live	-0.59878	0.479483	-0.195281	-0.548869	0.0422489	0.232038	-0.0187074	-0.726496	-0.241816	-0.594467	0.59465	0.252951	0.681162	-0.496496	-0.631648	-1.01582	-0.569898	0.777929	-0.299773	0.826568	-0.327544	-0.178046	-0.34233	0.0731878	-0.43897	-0.0731296	-0.205542	0.619777	-0.401798
L517	1_one	FW18H	1_FW	3_18	2_hypox	live	-1.32036	-1.54805	-1.63478	-3.42483	-2.09651	-1.12651	-1.33007	-1.66208	-1.67831	-1.85721	-1.45678	-1.76566	-1.94207	-1.75629	-2.44	-0.936717	-0.632908	-0.801469	-1.39261	-1.83689	-0.082454	-1.91285	-2.39212	-2.25667	-0.815186	-2.50194	-2.42591	-0.941677	-3.30696
L518	1_one	FW18H	1_FW	3_18	2_hypox	live	-0.50603	1.34057	0.503493	0.276592	0.607804	0.294704	0.55032	0.189469	-0.620972	0.179817	0.806293	-0.00385308	0.865571	0.024852	0.0735949	0.194746	0.0743142	0.737372	0.597352	1.36857	-0.0575125	-0.240921	0.16776	0.124838	0.0211782	0.715482	0.559529	0.646986	0.455429
L530	1_one	SW10H	3_SW	1_10	2_hypox	live	-1.39148	-1.82386	-0.931292	-1.89651	-3.0176	-2.13238	-0.583812	-0.846654	-3.02995	-0.893796	-1.48834	-2.29436	-1.45936	-0.866882	-1.85898	0.263643	-0.16927	-1.37878	-0.27343	0.0253557	-0.276129	-1.30744	-1.10796	-0.274229	-0.985236	-1.58271	-1.2818	-1.46883	-1.08439
L531	1_one	SW10H	3_SW	1_10	2_hypox	live	-0.181962	1.6242	0.496934	0.617071	0.256347	-0.295351	0.776436	0.396176	-0.510599	0.275645	0.206498	0.430587	1.16819	0.59256	0.411628	-0.00584983	0.426705	0.683539	1.13797	0.883193	0.663137	0.192936	0.833924	1.84642	1.33628	1.30544	0.906034	0.529641	0.0872913
L539	1_one	SW10H	3_SW	1_10	2_hypox	live	0.0200227	2.34572	1.1424	1.28724	0.1315	0.352252	1.40762	1.00555	-9.09e-05	1.06586	-0.706253	0.49676	1.37581	1.48216	1.18882	0.285777	0.750238	0.430791	1.51361	2.36473	0.95475	0.506835	1.36165	2.08926	1.18944	2.08926	1.48047	0.534095	1.1471
L547	1_one	SW10N	3_SW	1_10	1_norm	live	-0.0279666	1.83476	1.15629	1.23732	0.113231	-0.587448	1.48581	1.50245	-0.521731	0.878735	-0.574382	0.372953	1.61036	1.19818	0.964854	1.05474	0.543872	0.948959	1.83541	1.75878	1.28584	0.408677	1.13824	1.66176	-0.0184122	1.64238	1.20536	0.161049	1.37632
L556	1_one	SW10N	3_SW	1_10	1_norm	live	-0.476271	1.63019	0.683202	0.87923	-0.404558	-0.925456	0.962507	0.33085	-0.847894	0.559412	-0.325668	-0.137785	0.911693	0.476392	0.458223	0.345057	0.169246	-0.0763991	1.08475	2.03576	0.439543	-0.44118	0.84059	1.0555	-0.256935	1.34963	1.14042	-0.0738228	1.04531
L557	1_one	SW10N	3_SW	1_10	1_norm	live	-1.52916	-0.674351	-0.677675	-1.82516	-2.89328	-2.20982	-0.671331	-1.26326	-2.82273	-0.930674	-1.81564	-2.86347	-1.56455	-0.753116	-1.50646	-0.524256	-1.22614	-1.10678	-0.63434	-1.1634	-0.115122	-2.09354	-3.14494	-0.637353	-1.5323	-1.69444	-1.15881	-1.97125	-1.77726
L565	1_one	SW18H	3_SW	3_18	2_hypox	live	-0.0300437	1.67407	0.52089	0.745093	0.057639	-0.0144076	1.41663	1.05143	-0.279462	0.755332	0.344115	1.16407	1.40714	0.64492	0.644227	0.73288	0.344365	0.810042	1.51144	2.30973	1.30697	0.629057	0.754274	1.62837	1.36321	1.1397	0.688641	0.515696	0.55625
L566	1_one	SW18H	3_SW	3_18	2_hypox	live	-1.5992	-1.12103	-1.14046	-2.1586	-2.70011	-2.51718	-1.75882	-3.05584	-1.97998	-1.16964	-1.79903	-2.82155	-1.51486	-1.39249	-1.39704	-0.967118	-1.07632	-2.22559	-2.12606	-3.27379	-1.93962	-3.02346	-2.38595	-1.62052	-2.34673	-2.28698	-1.40162	-1.22988	-3.04718
L567	1_one	SW18H	3_SW	3_18	2_hypox	live	-0.204513	0.0166563	0.411236	0.407389	0.521929	0.377326	0.686509	0.216179	-0.12318	0.171497	-0.0502279	0.738418	0.984352	-0.0901224	0.387081	-0.156902	0.238908	0.54877	0.684973	1.43529	0.780238	0.692038	0.401138	0.692197	1.24052	0.299064	0.361173	0.0573096	0.322644
L572	1_one	SW18N	3_SW	3_18	1_norm	live	-1.33805	-0.321562	-0.370475	-1.67102	-2.02869	-2.45776	-0.990121	-1.42156	-2.25798	-0.4579	-1.48805	-1.99898	-0.786949	-0.335721	-1.13734	0.111487	-0.492373	-1.55274	-0.791436	-1.65971	-0.588809	-2.28613	-1.40247	-0.957467	-1.60964	-1.59606	-0.808714	-0.628597	-1.83878
L573	1_one	SW18N	3_SW	3_18	1_norm	live	-0.167374	-0.200725	-0.124319	-0.10044	0.449117	0.308755	0.31898	0.355472	-0.43786	-0.453092	0.488079	-0.0318624	0.906821	-0.180555	0.272369	-0.36043	-0.0622186	0.712284	0.0765523	1.08822	-0.542871	0.0235405	-0.235337	-0.287007	-0.179516	0.29624	-0.19524	0.187223	-0.130229
L583	1_one	SW18N	3_SW	3_18	1_norm	live	-0.363459	1.65819	0.557013	0.664531	0.0303273	-0.251904	1.23159	0.989121	-0.558229	0.686894	-0.876378	0.498112	0.885284	0.767078	0.640032	0.670351	0.269535	0.400986	1.46432	0.900717	1.5244	0.206412	0.710867	1.57693	0.0750501	1.18059	0.800147	0.187542	0.508743
